# Supplementary material for: Design and Synthesis of Benzimidazole-Chalcone Derivatives as Potential Anticancer Agents
Source: PubMed Central journal article supplement (PMC6767017; doi:10.3390/molecules24183259), 2019-09-06
Supplement: molecules-24-03259-s001.pdf [file molecules-24-03259-s001.pdf]

## *Supporting Information*

# Design and Synthesis of Benzimidazole-Chalcone Derivatives as Potential Anticancer Agents

Cheng-Ying Hsieh <sup>1</sup>, Pi-Wen Ko <sup>2</sup>, Yu-Jui Chang <sup>1</sup>, Mohit Kapoor <sup>3</sup>, Yu-Chuan Liang <sup>4</sup>, Hsueh-Liang Chu <sup>5</sup>, Hui-Hsien Lin <sup>6</sup>, Jia-Cherng Horng <sup>1,\*</sup> and Ming-Hua Hsu <sup>7,\*</sup>

- <sup>1</sup> Department of Chemistry, National Tsing Hua University, Hsinchu 30013, Taiwan; futariwhisper@gmail.com (C.-Y.H.); rick5569268@gmail.com (Y.-J.C.)
- <sup>2</sup> Department of Biomedical Engineering and Environmental Sciences, National Tsing Hua University, Hsinchu 30013, Taiwan; koko37bebe@hotmail.com (P.-W.K.)
- <sup>3</sup> Chitkara University Institute of Engineering and Technology, Chitkara University, Punjab 140 401, India; mohitkapoor.chemistry@gmail.com (M.K.)
- <sup>4</sup> Agricultural Biotechnology Research Center, Academia Sinica, Taipei 11529, Taiwan; ycliang@sinica.edu.tw (Y.-C.L.)
- <sup>5</sup> Graduate Institute of Translational Medicine, College of Medicine and Technology, Taipei Medical University, Taipei 11031, Taiwan; szxchu@gmail.com (H.-L.C.)
- <sup>6</sup> Division of Radiotherapy, Department of Oncology, Taipei Veterans General Hospital, Taipei 11217, Taiwan; twwarcgogo@gmail.com (H.-H.L.)
- <sup>7</sup> Department of Chemistry, National Changhua University of Education, Changhua 50007, Taiwan
- \* Correspondence: jchorng@mx.nthu.edu.tw (J.-C.H.); minghua@cc.ncue.edu.tw (M.-H.H.); Tel.: +886-3-5715131 (ext. 35635) (J.-C.H.); +886-4-7232105(ext. 3547) (M.-H.H.) Fax: +886-4-7211190 (M.-H.H.)

These authors contributed equally to this work.

### Contents

#### (1) Characterization Data:

<sup>1</sup>H-NMR, <sup>13</sup>C-NMR, IR, HPLC

#### (2) Flow Cytometry Data

(1) Characterization Data

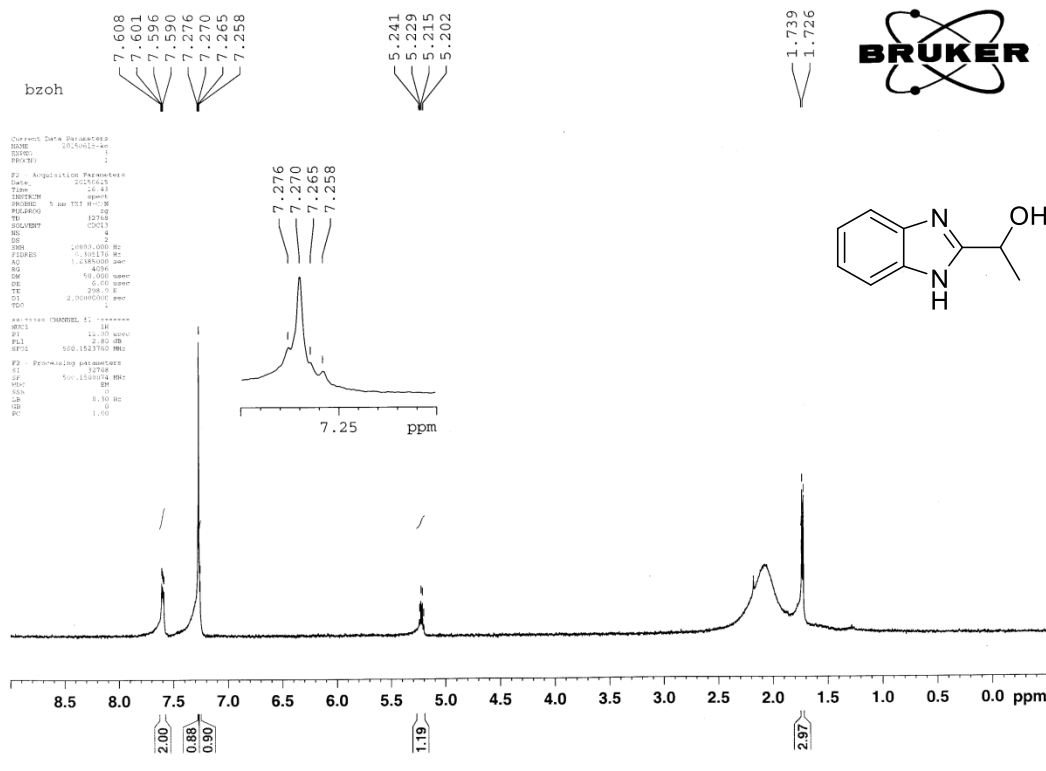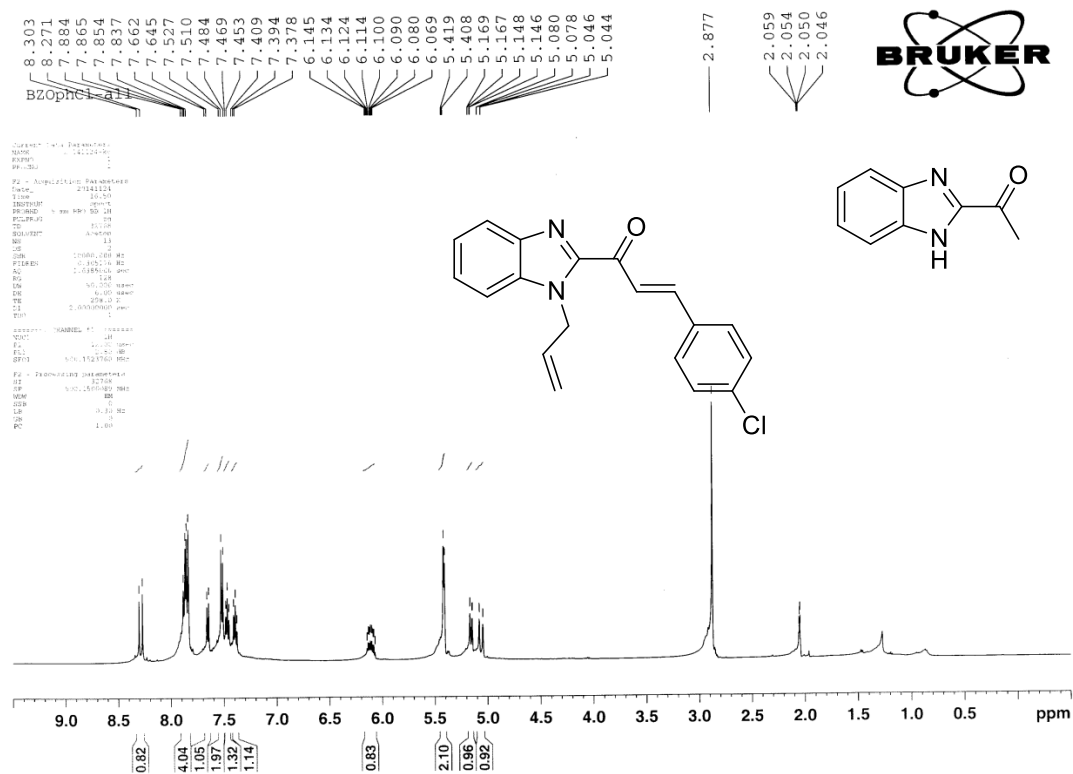

<sup>1</sup>H-NMR spectrum of compound 19d

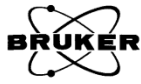

BZ0ph Cl-all

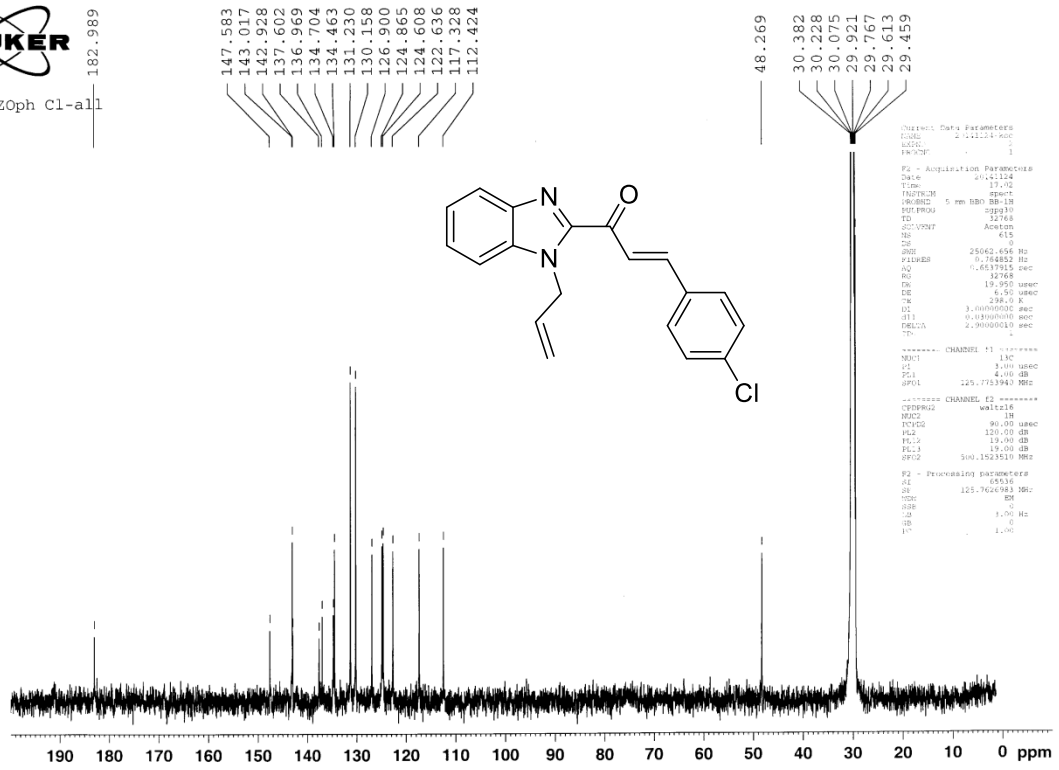

<sup>13</sup>C-NMR spectrum of compound 19d

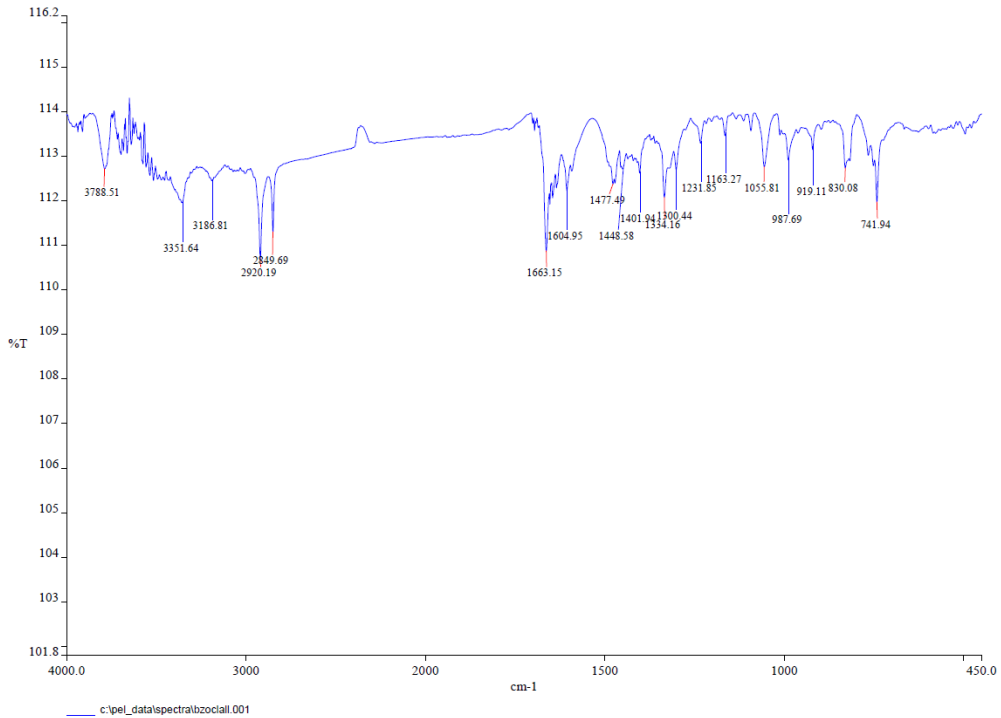

IR spectrum of compound 19d

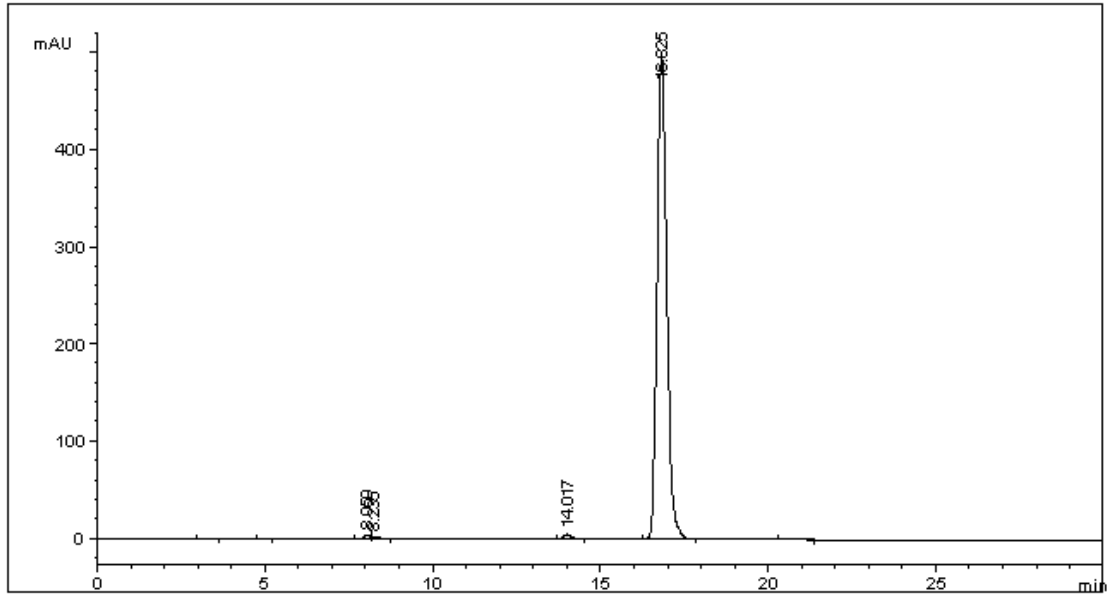

HPLC spectrum of compound 19d

| Peak # | RetTime [min] | Width [min] | Area mAU *s | Area % |
|--------|---------------|-------------|-------------|--------|
| 1      | 8.05          | 0.2178      | 56.94883    | 0.5562 |
| 2      | 8.235         | 0.2043      | 36.42011    | 0.3557 |
| 3      | 14.017        | 0.2913      | 94.06382    | 0.9187 |
| 4      | 16.825        | 0.3131      | 10051.4     | 98.169 |

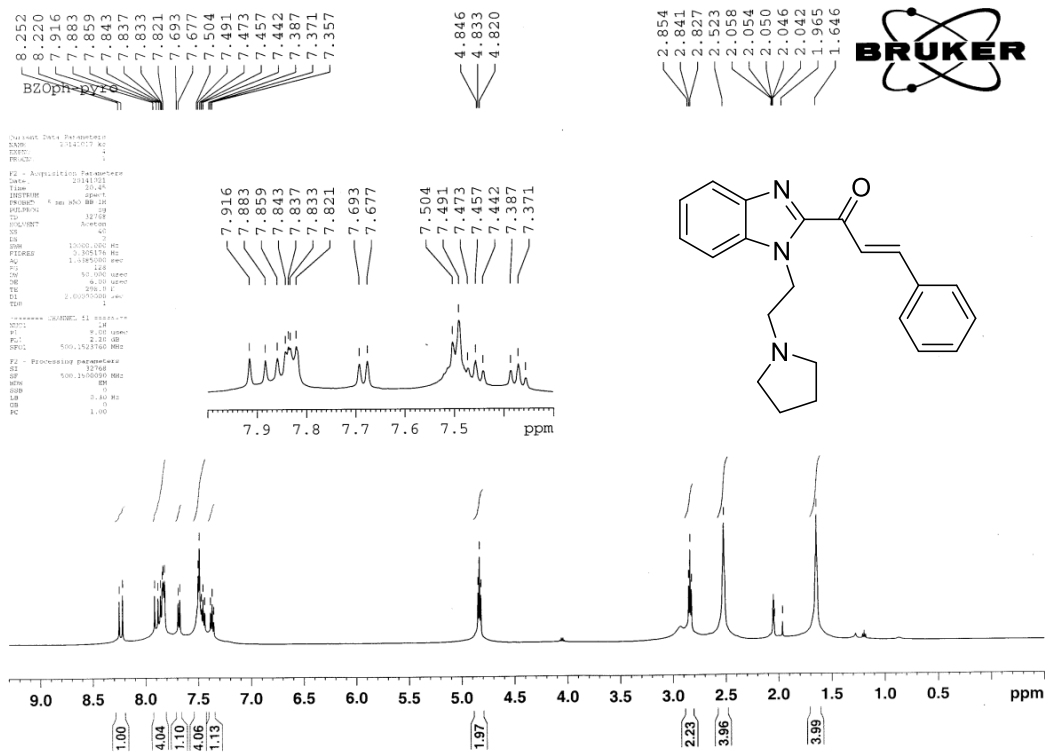

<sup>1</sup>H-NMR spectrum of compound 20a

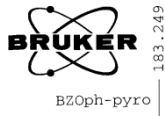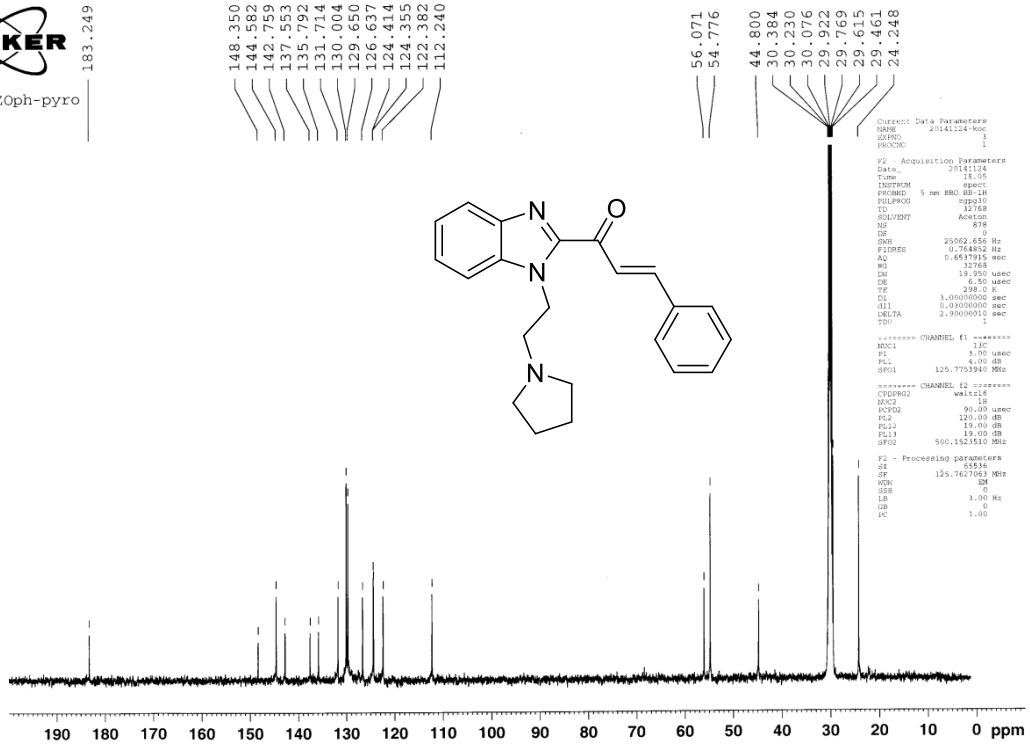

<sup>13</sup>C-NMR spectrum of compound 20a

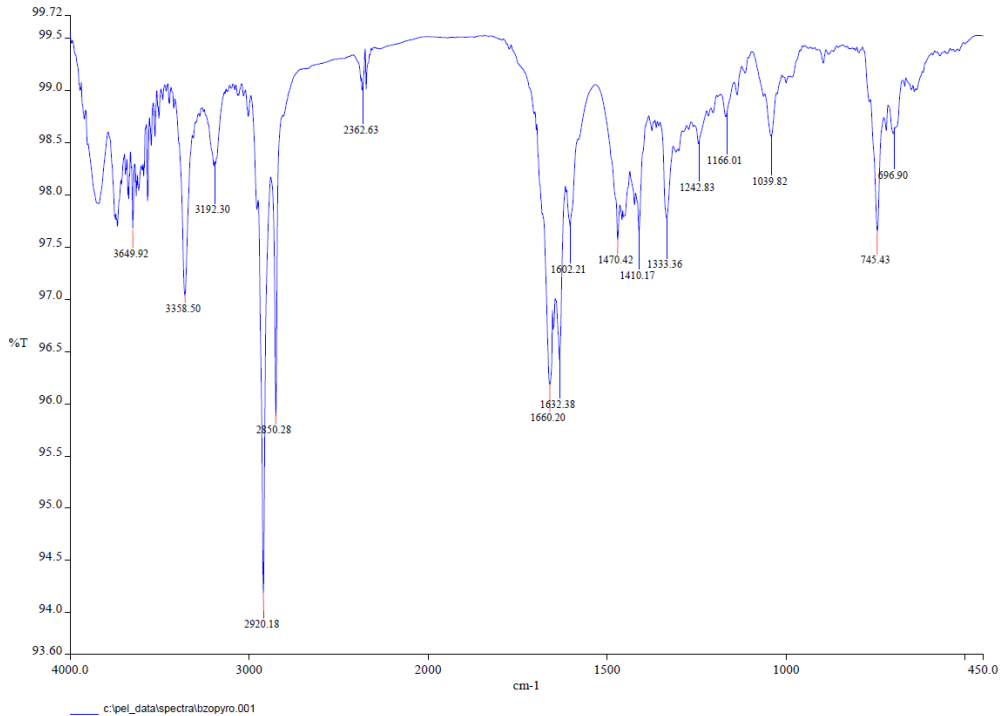

IR spectrum of compound 20a

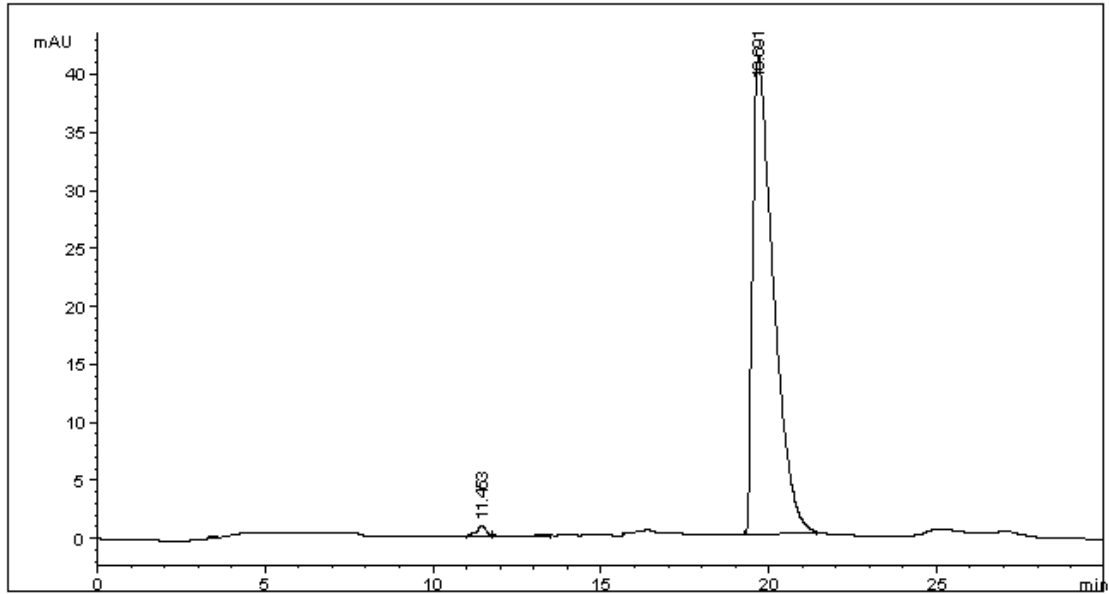

HPLC spectrum of compound 20a

| Peak # | RetTime [min] | Width [min] | Area mAU *s | Area %  |
|--------|---------------|-------------|-------------|---------|
| 1      | 11.453        | 0.3000      | 71.80160    | 3.8726  |
| 2      | 19.691        | 0.6477      | 1782.26953  | 96.1274 |

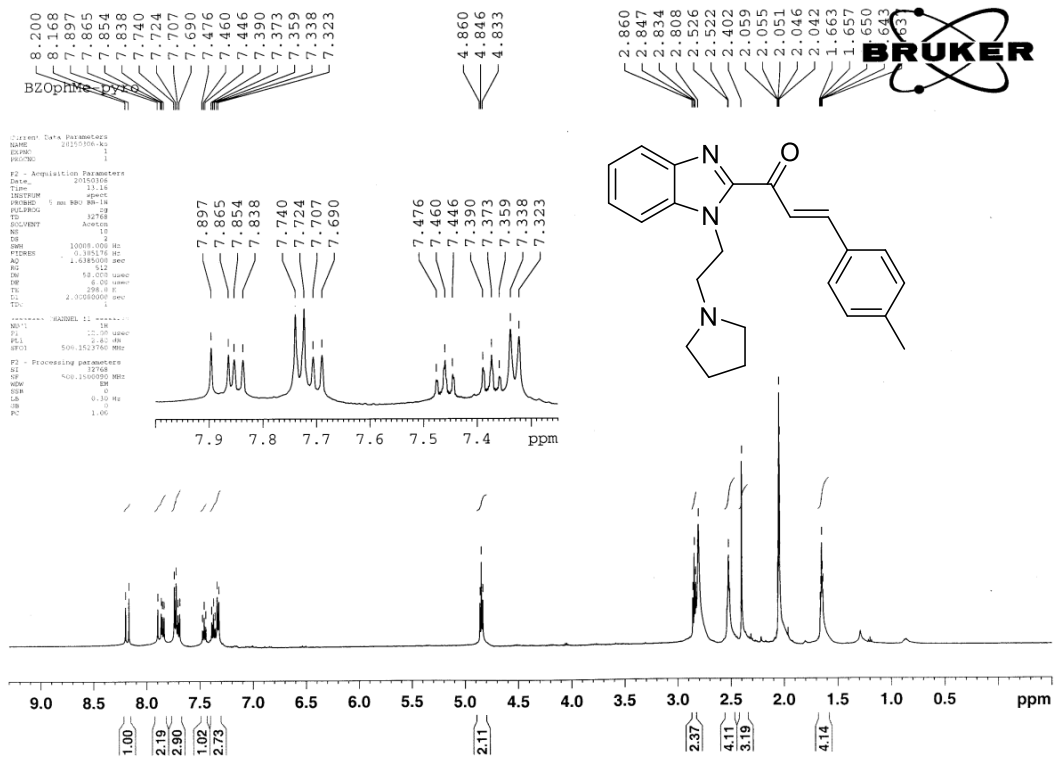

<sup>1</sup>H-NMR spectrum of compound 20b

**BRUKER**  
BZOphMe-pyzo

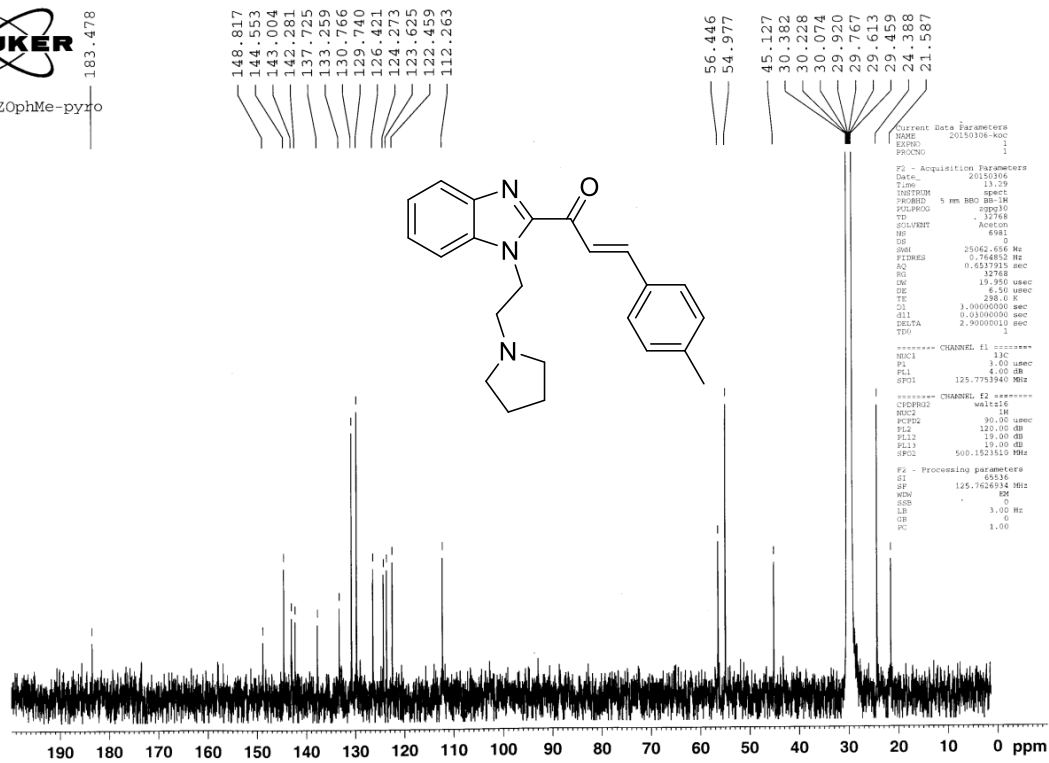

<sup>13</sup>C-NMR spectrum of compound 20b

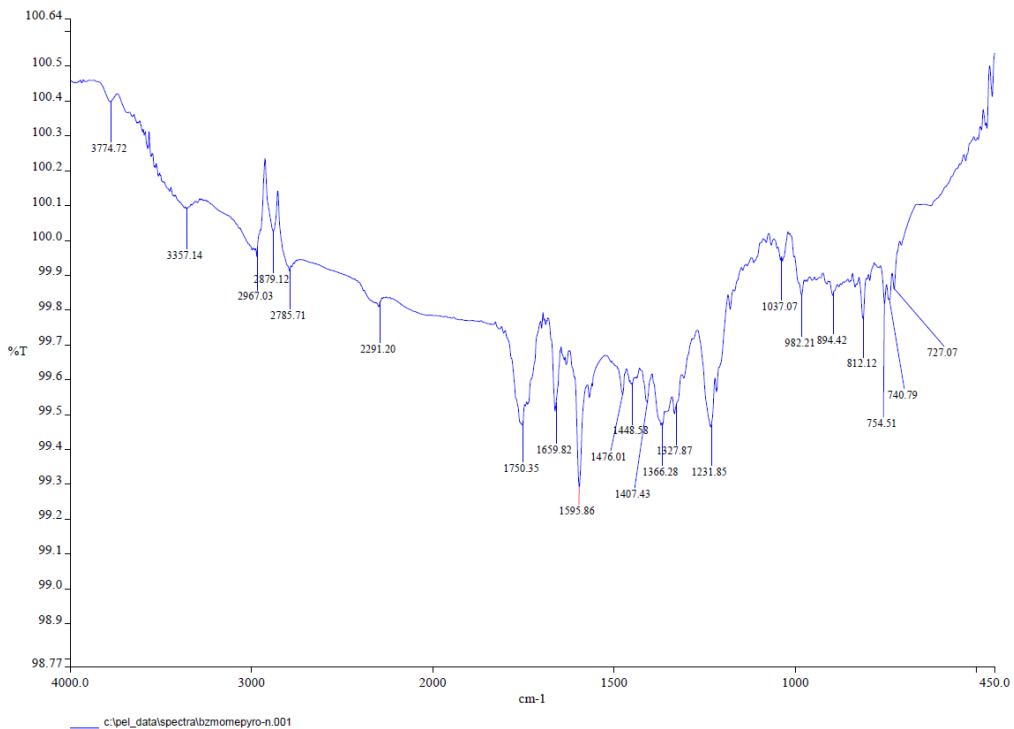

IR spectrum of compound 20b

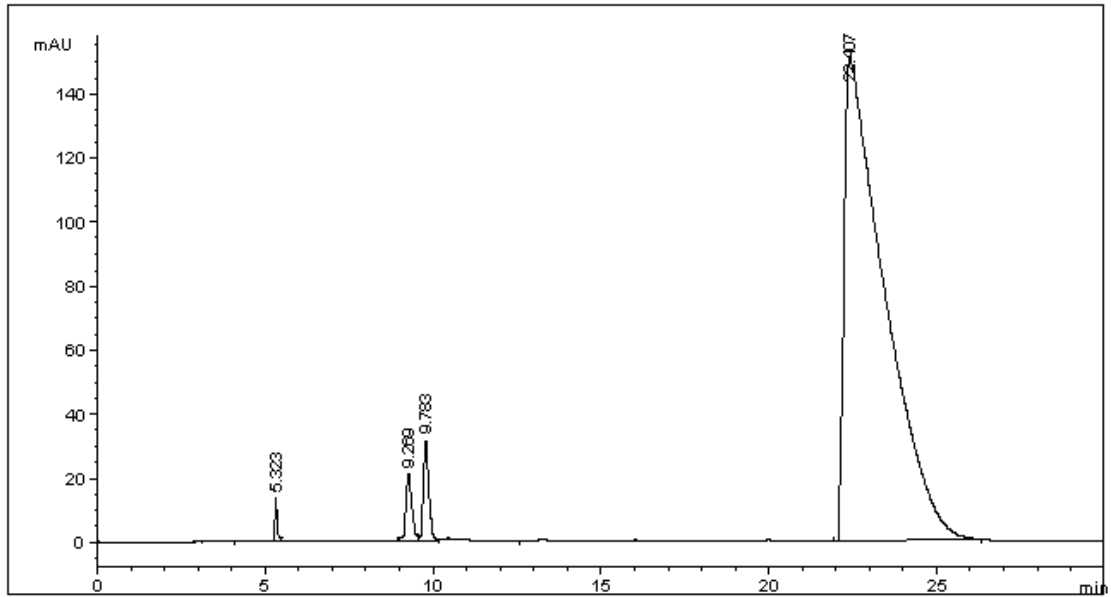

HPLC spectrum of compound 20b

| Peak # | RetTime [min] | Width [min] | Area mAU *s | Area %  |
|--------|---------------|-------------|-------------|---------|
| 1      | 5.323         | 0.0522      | 36.09950    | 0.2756  |
| 2      | 9.270         | 0.1684      | 180.59157   | 1.3785  |
| 3      | 9.783         | 0.1675      | 287.45895   | 2.1943  |
| 4      | 22.407        | 1.3899      | 12596.0     | 96.1516 |

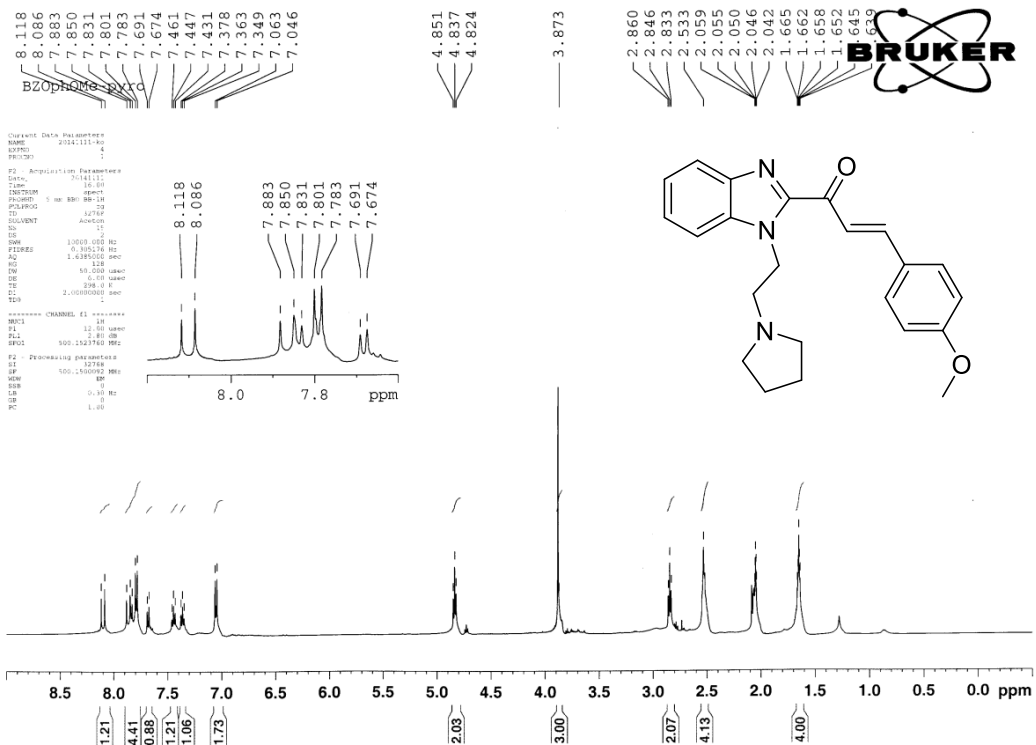

<sup>1</sup>H-NMR spectrum of compound 20c



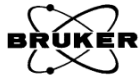

BZOphOMe-pyro

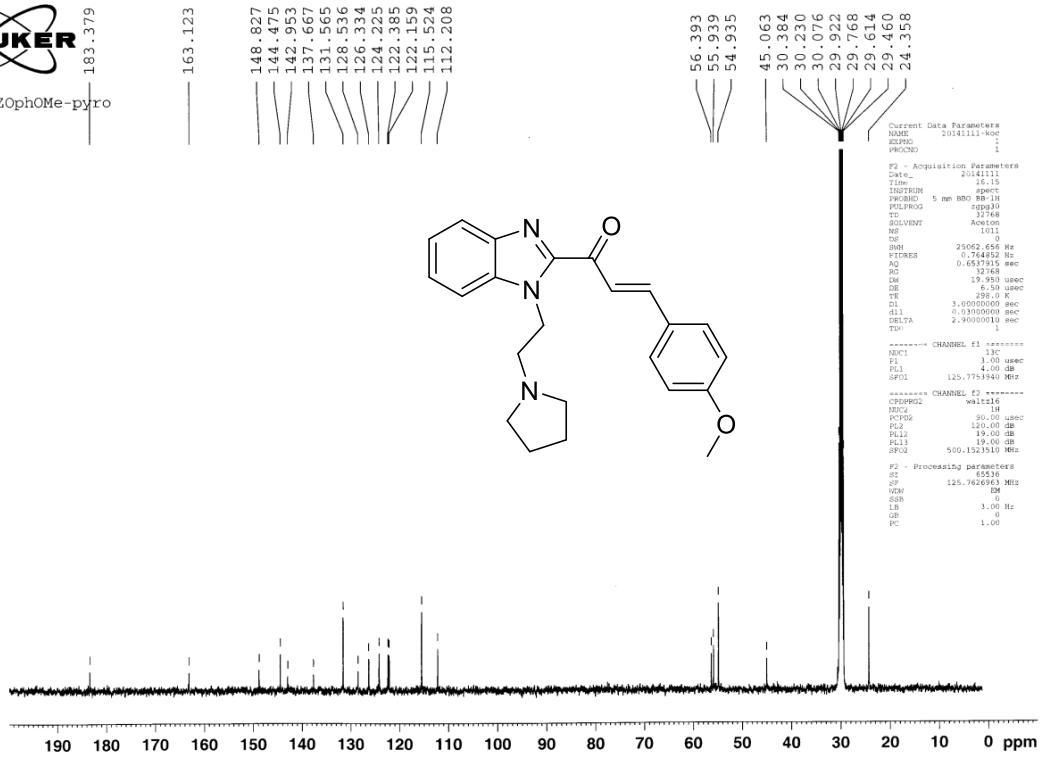

<sup>13</sup>C-NMR spectrum of compound 20c

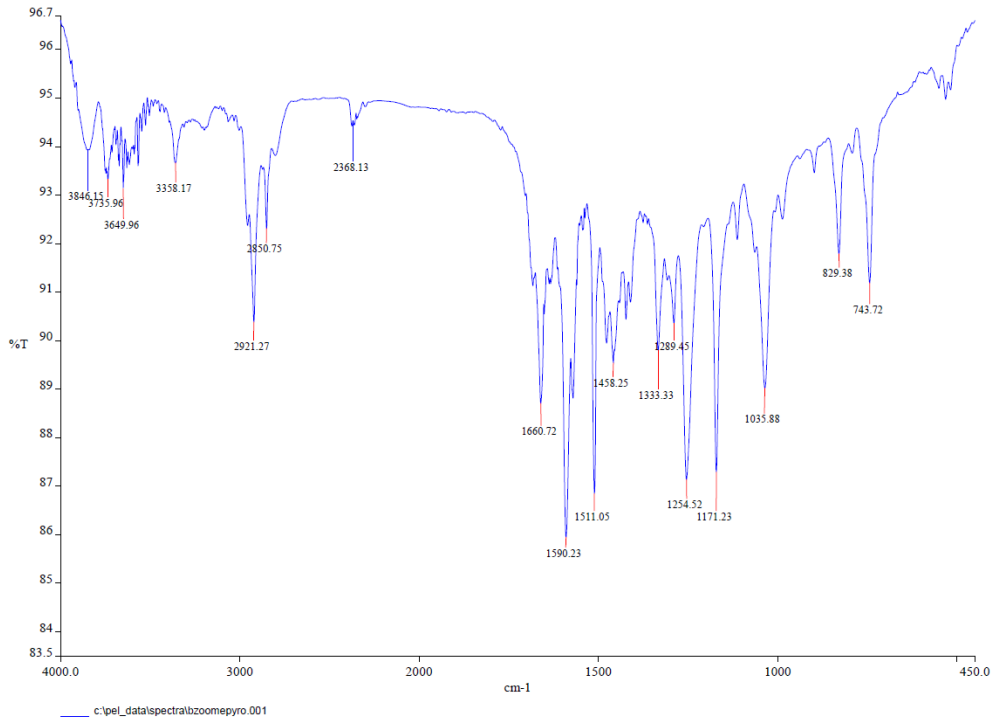

IR spectrum of compound 20c

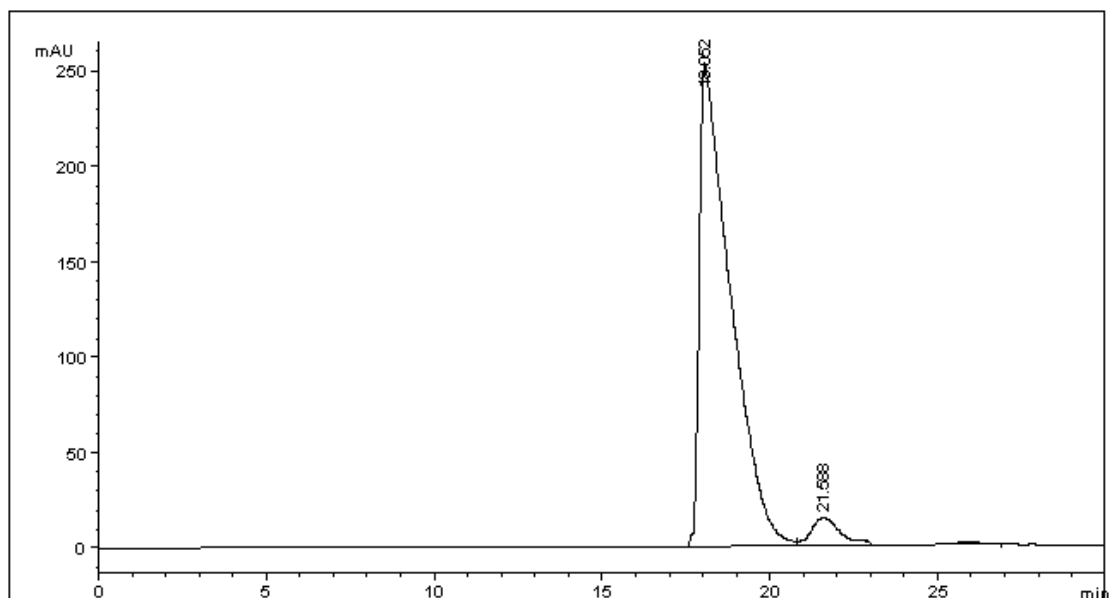

HPLC spectrum of compound 20c

| Peak # | RetTime [min] | Width [min] | Area mAU *s | Area %  |
|--------|---------------|-------------|-------------|---------|
| 1      | 18.052        | 0.8788      | 16437.4     | 95.0057 |
| 2      | 21.588        | 0.9133      | 864.08667   | 4.9943  |

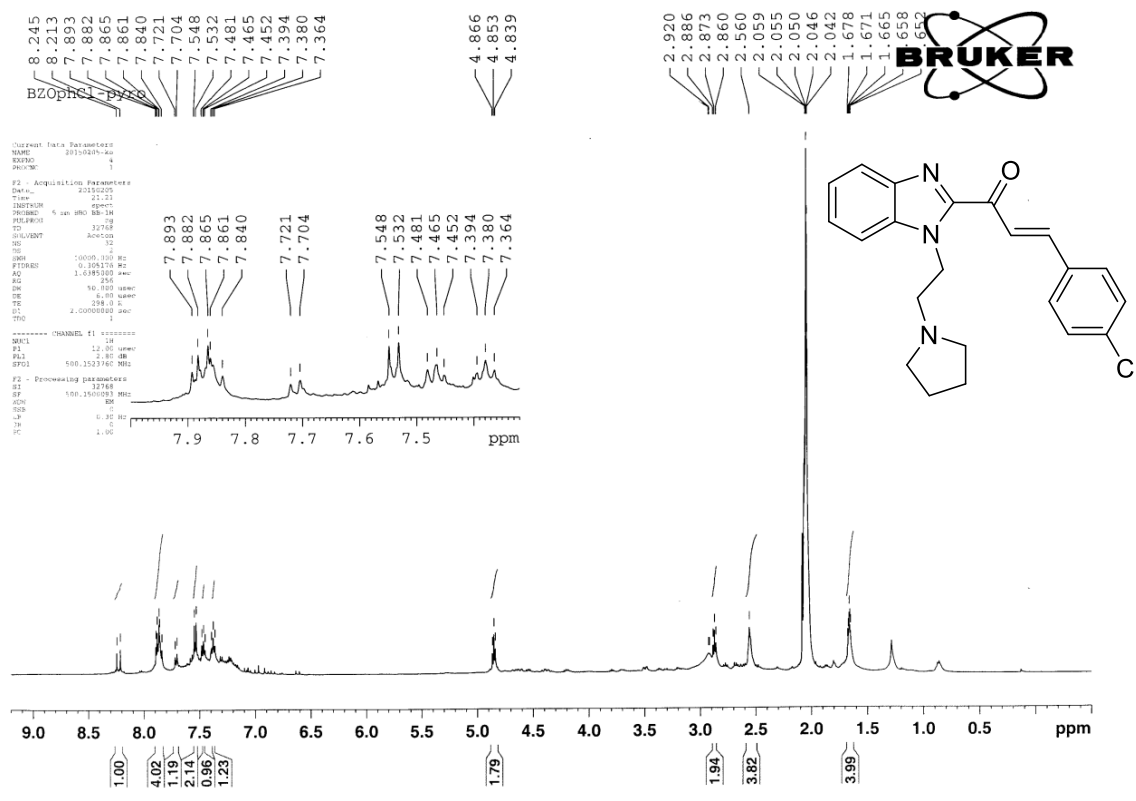

<sup>1</sup>H-NMR spectrum of compound 20d

BZpy

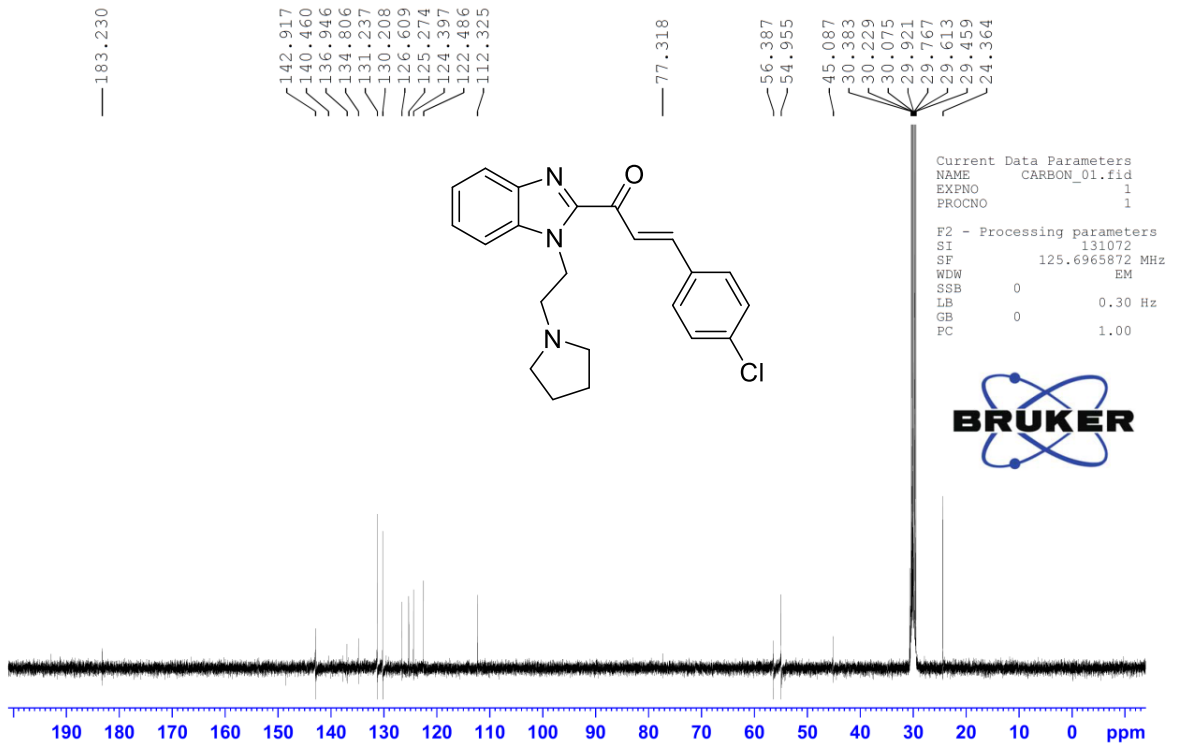

<sup>13</sup>C-NMR spectrum of compound 20d

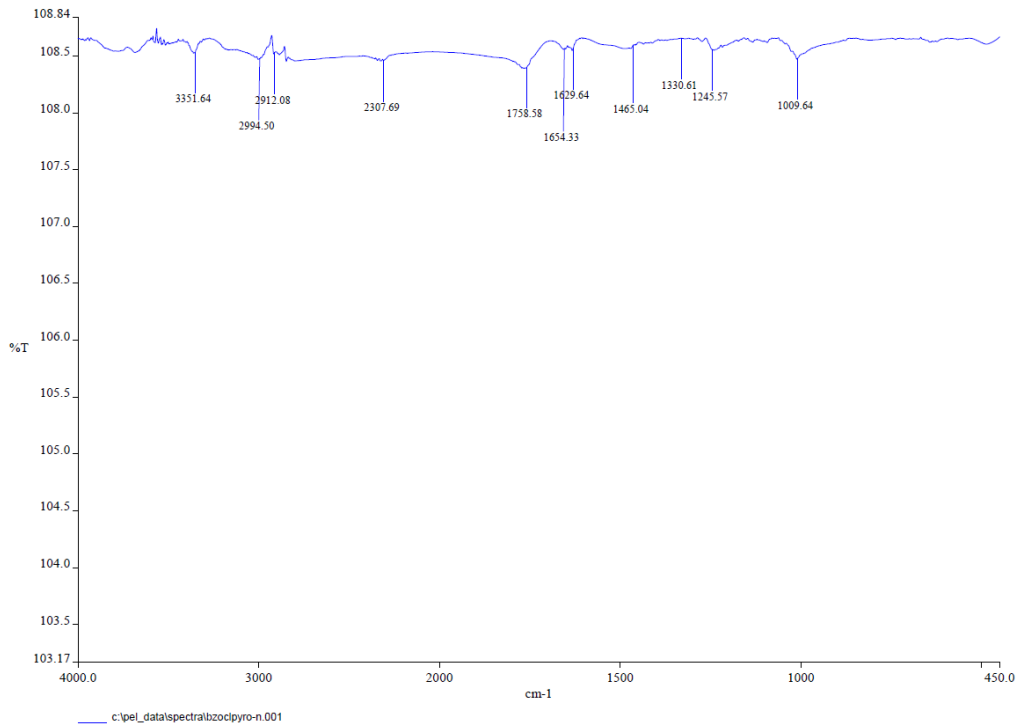

IR spectrum of compound 20d

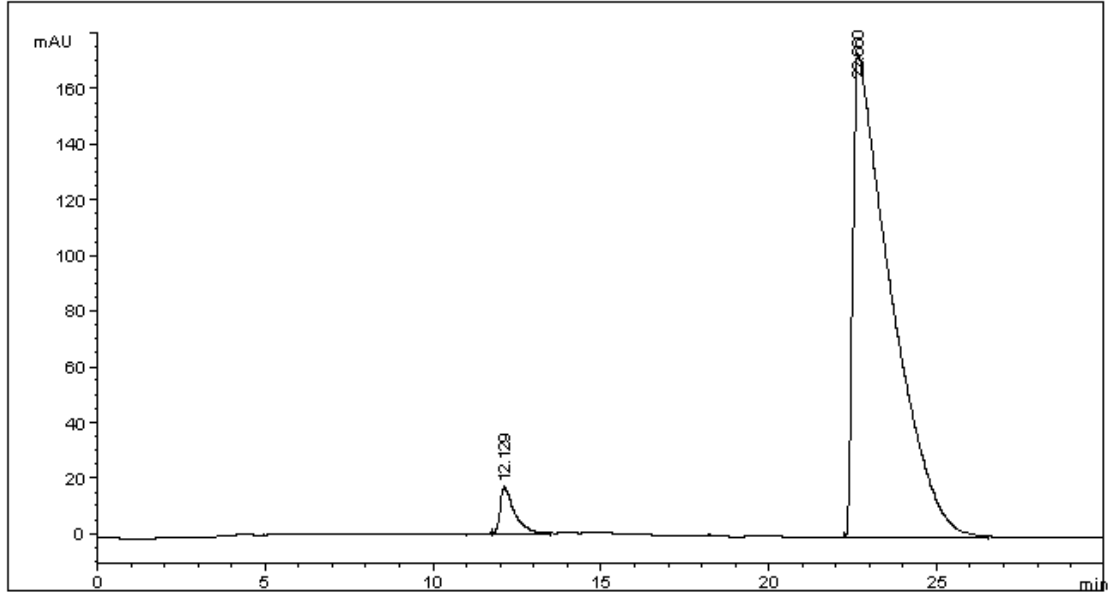

HPLC spectrum of compound 20d

| Peak # | RetTime [min] | Width [min] | Area mAU *s | Area %  |
|--------|---------------|-------------|-------------|---------|
| 1      | 12.129        | 0.4295      | 491.38254   | 3.5048  |
| 2      | 22.660        | 1.0394      | 13528.9     | 96.4953 |

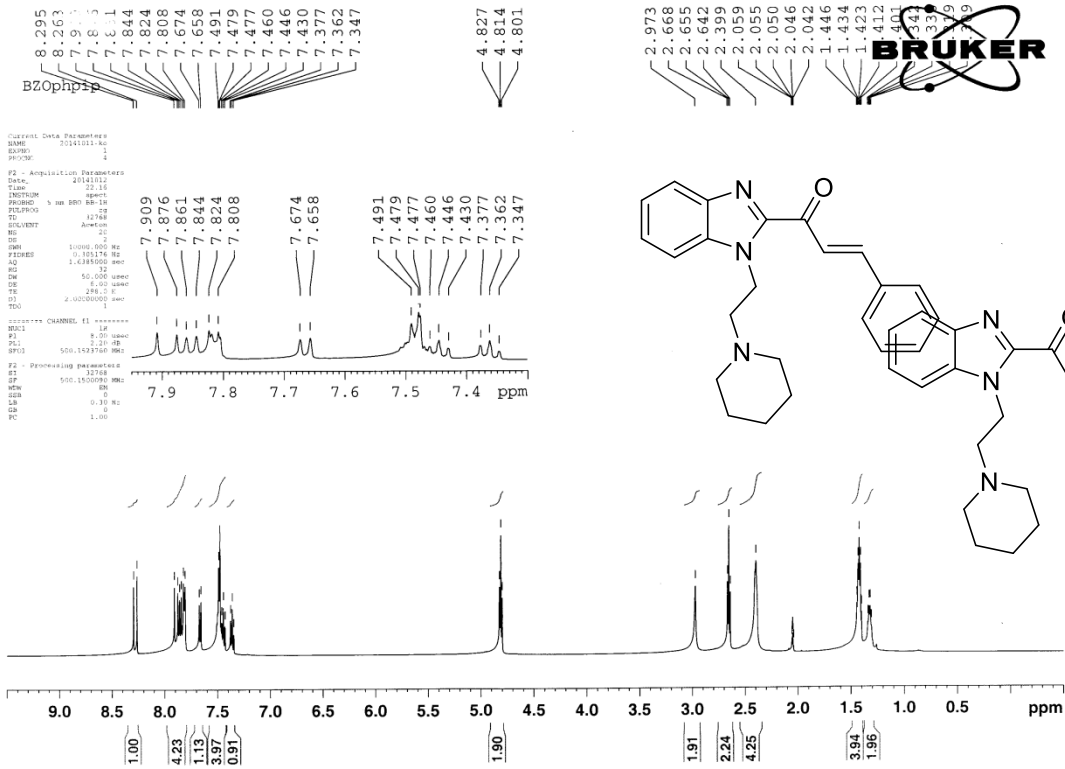

<sup>1</sup>H-NMR spectrum of compound 21a

**BRUKER**  
BZO-ph-pip

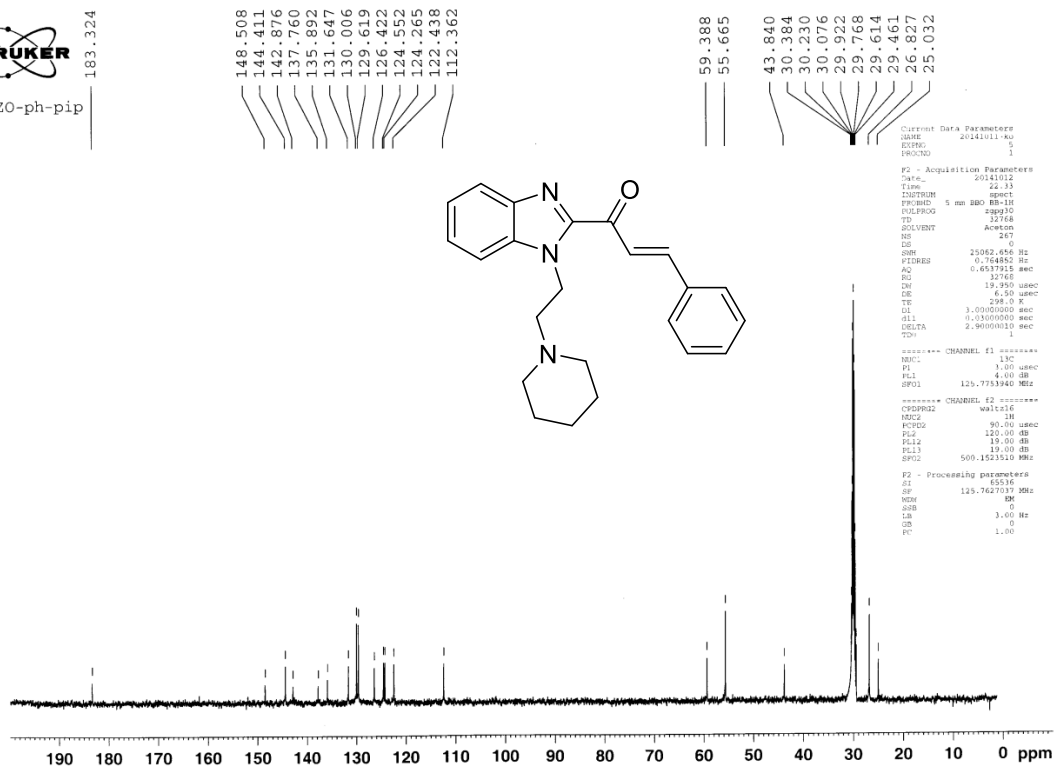

<sup>13</sup>C-NMR spectrum of compound 21a

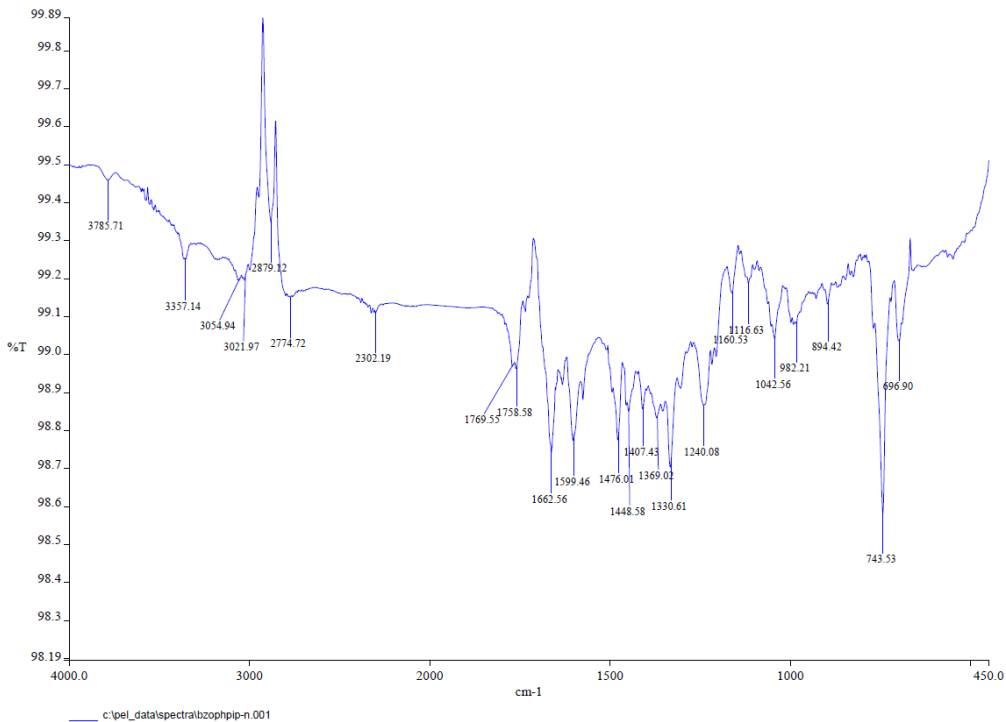

IR spectrum of compound 21a

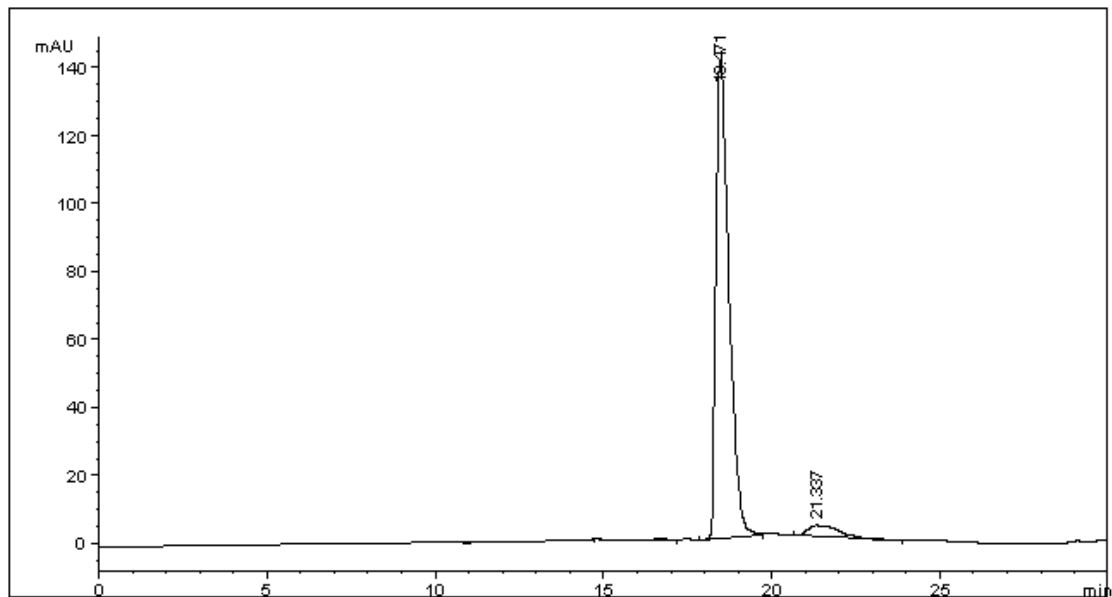

HPLC spectrum of compound 21a

| Peak # | RetTime [min] | Width [min] | Area mAU *s | Area %  |
|--------|---------------|-------------|-------------|---------|
| 1      | 18.471        | 0.4193      | 3837.38745  | 95.0169 |
| 2      | 21.337        | 0.9008      | 201.24811   | 4.9831  |

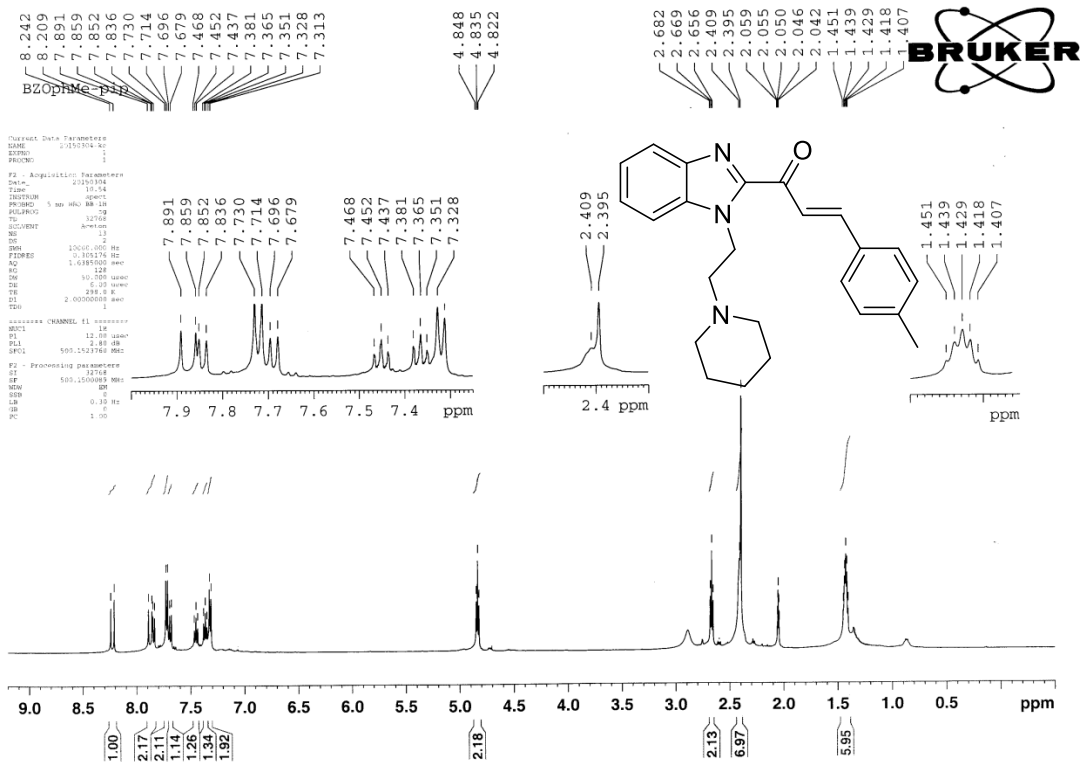

<sup>1</sup>H-NMR spectrum of compound 21b

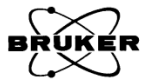

BZOphMe-pip

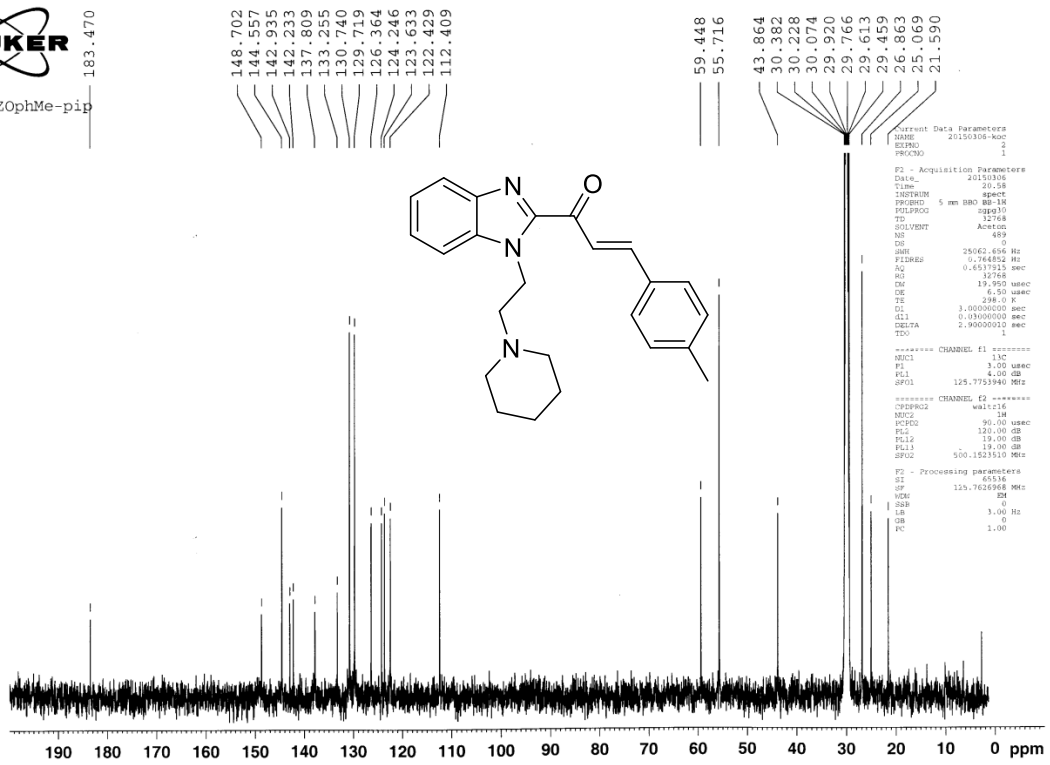

<sup>13</sup>C-NMR spectrum of compound 21b

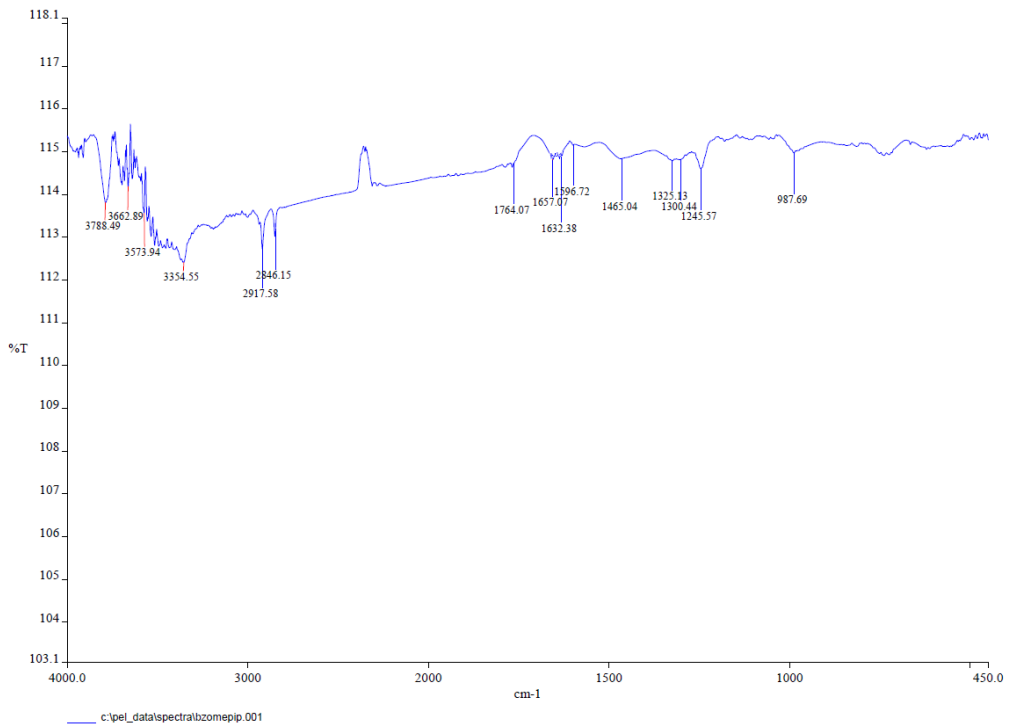

IR spectrum of compound 21b

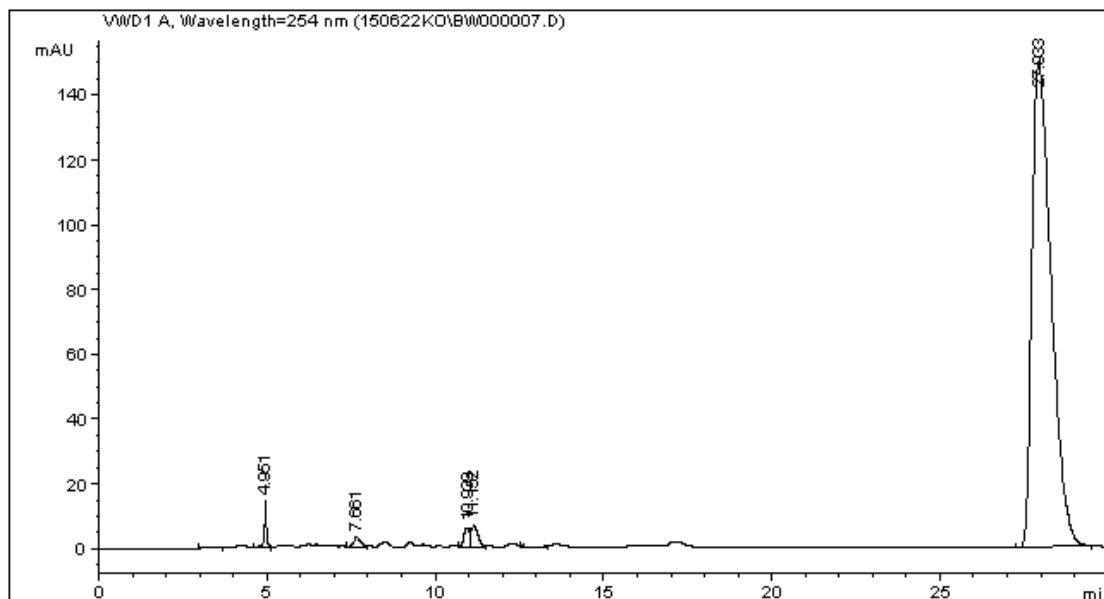

HPLC spectrum of compound 21b

| Peak # | RetTime [min] | Width [min] | Area mAU *s | Area %  |
|--------|---------------|-------------|-------------|---------|
| 1      | 4.951         | 0.0699      | 68.29758    | 1.0947  |
| 2      | 7.661         | 0.1966      | 38.23409    | 0.6129  |
| 3      | 10.939        | 0.1666      | 64.38687    | 1.0320  |
| 4      | 11.152        | 0.2067      | 91.49991    | 1.4666  |
| 5      | 27.933        | 0.6205      | 5976.29102  | 95.7937 |

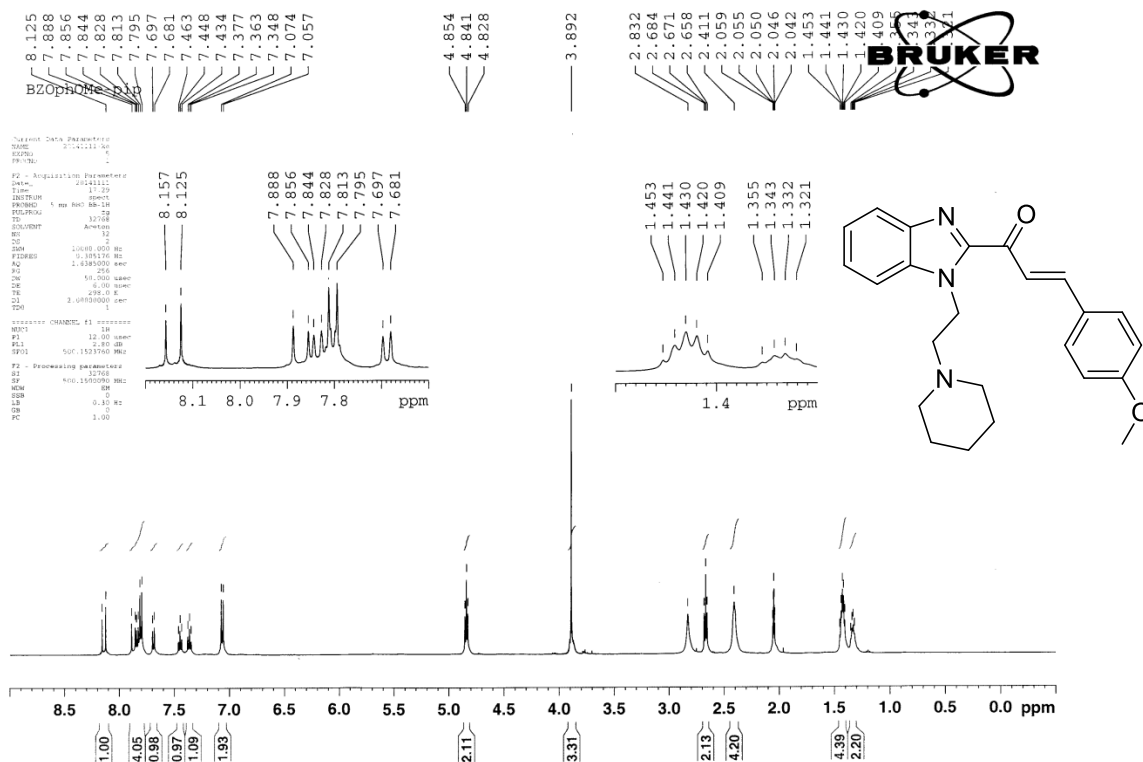

<sup>1</sup>H-NMR spectrum of compound 21c



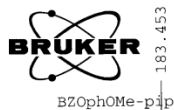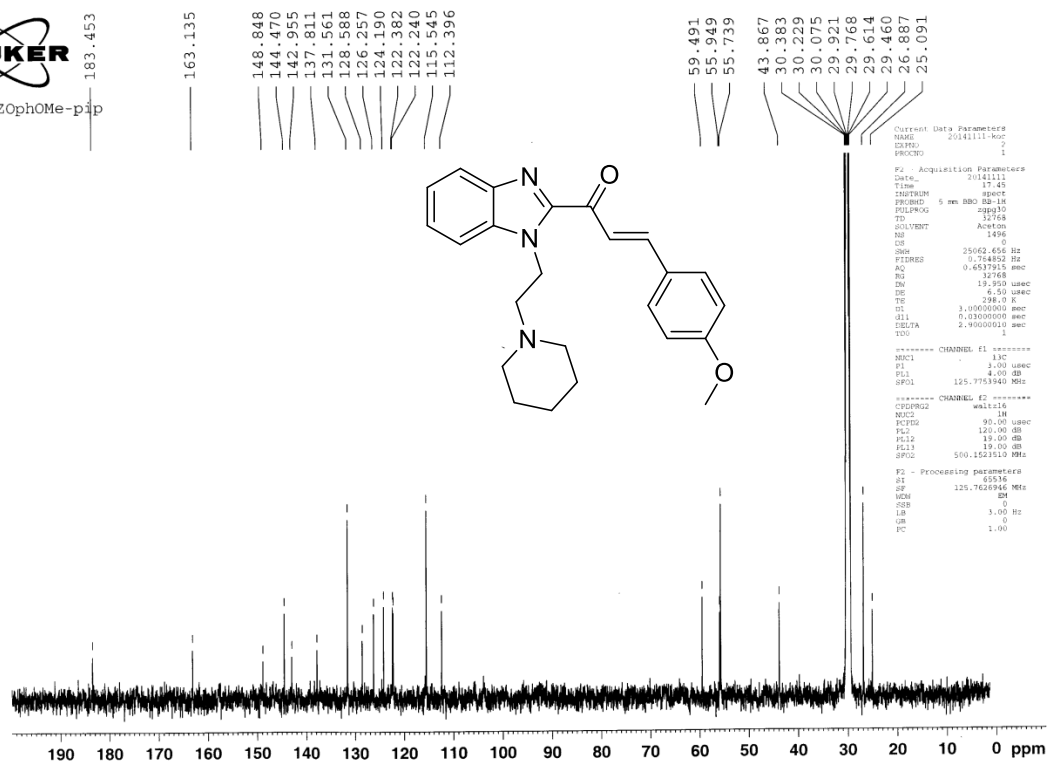

<sup>13</sup>C-NMR spectrum of compound 21c

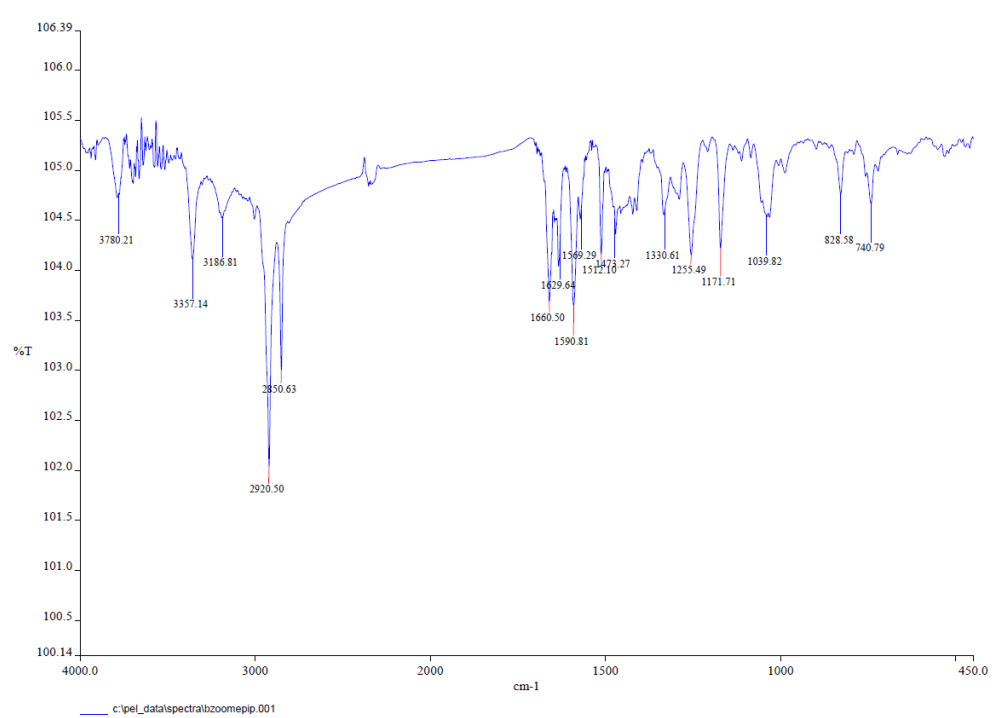

IR spectrum of compound 21c

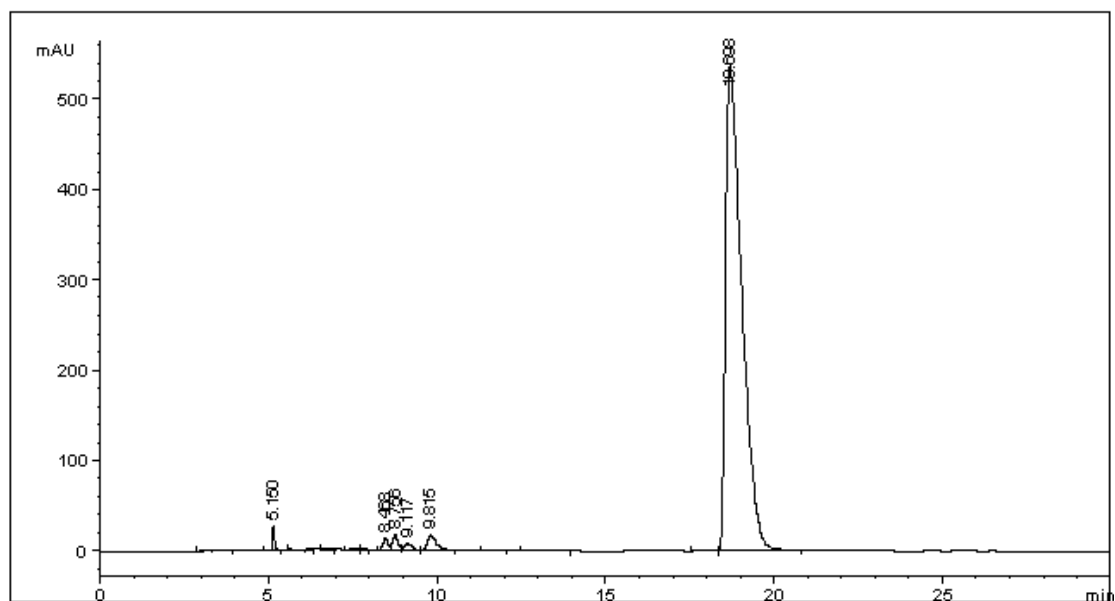

HPLC spectrum of compound 21c

| Peak # | RetTime [min] | Width [min] | Area mAU *s | Area %  |
|--------|---------------|-------------|-------------|---------|
| 1      | 5.150         | 0.0654      | 120.31086   | 0.6396  |
| 2      | 8.468         | 0.1586      | 143.72900   | 0.7641  |
| 3      | 8.756         | 0.1657      | 182.23738   | 0.9688  |
| 4      | 9.117         | 0.2214      | 113.33360   | 0.6025  |
| 5      | 9.815         | 0.2669      | 299.16333   | 1.5904  |
| 6      | 18.698        | 0.4951      | 17951.6     | 95.4346 |

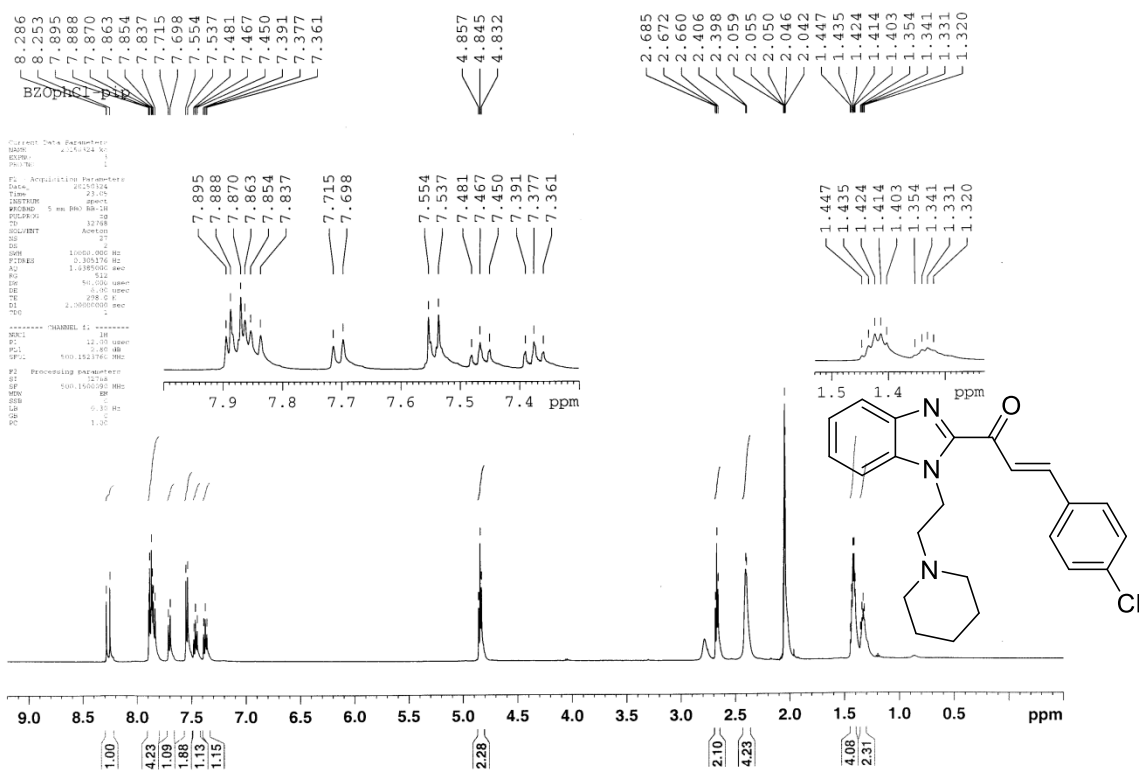

<sup>1</sup>H-NMR spectrum of compound 21d

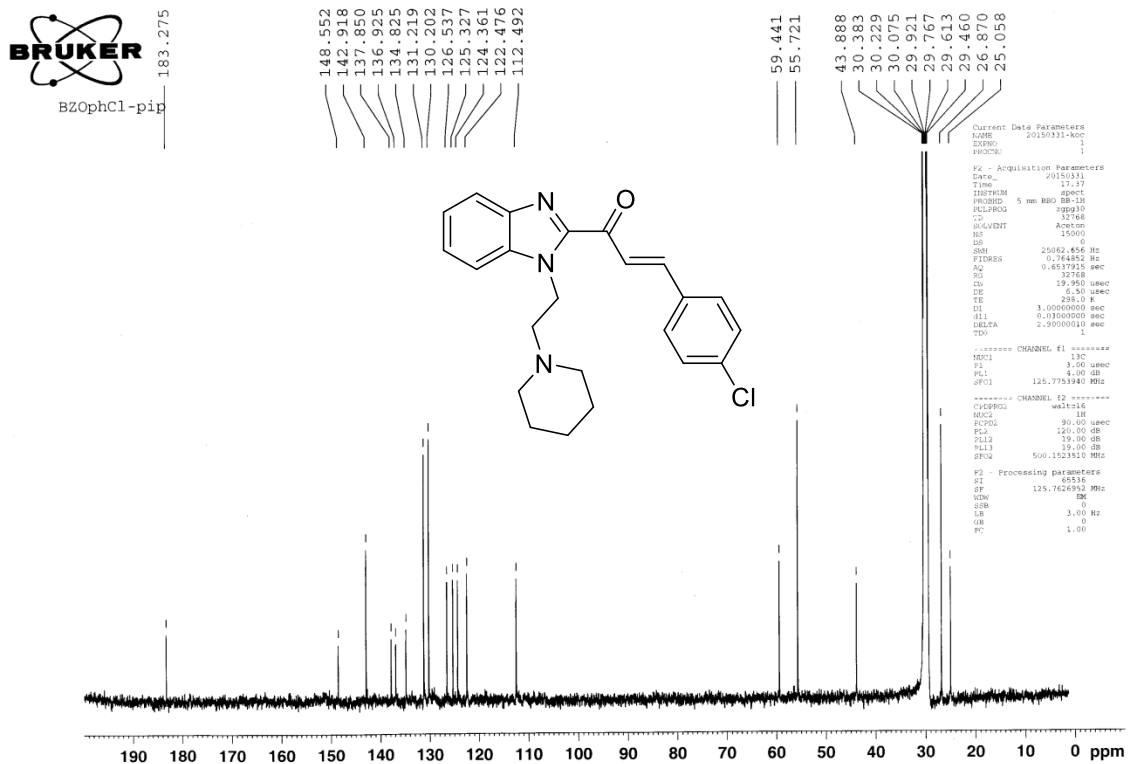

<sup>13</sup>C-NMR spectrum of compound 21d

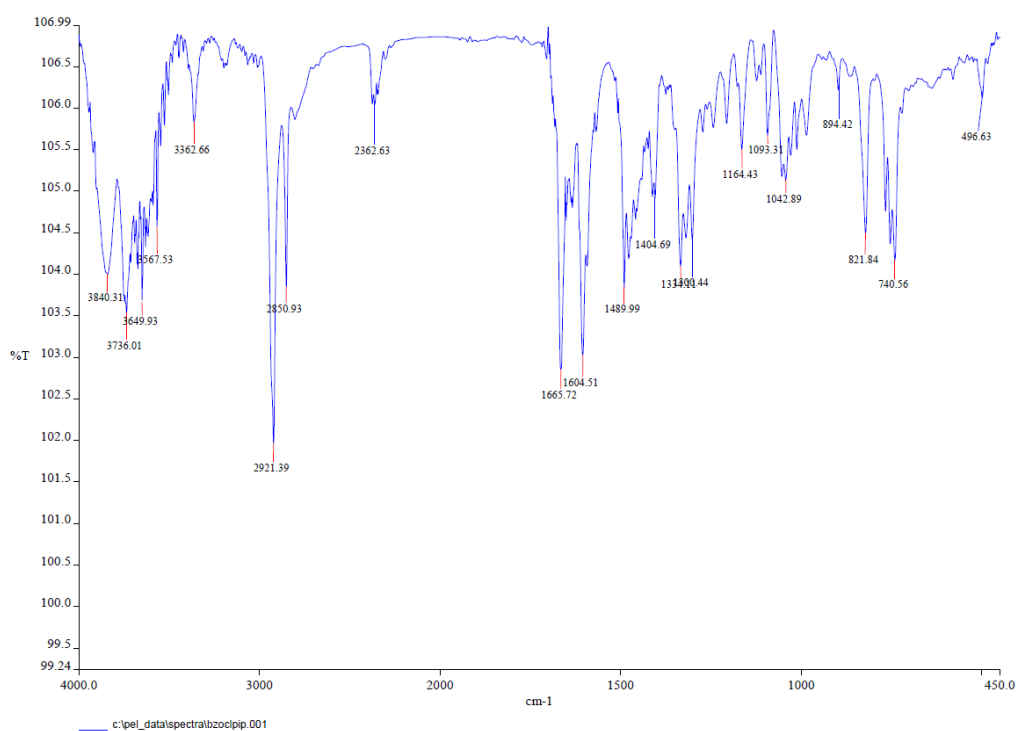

IR spectrum of compound 21d

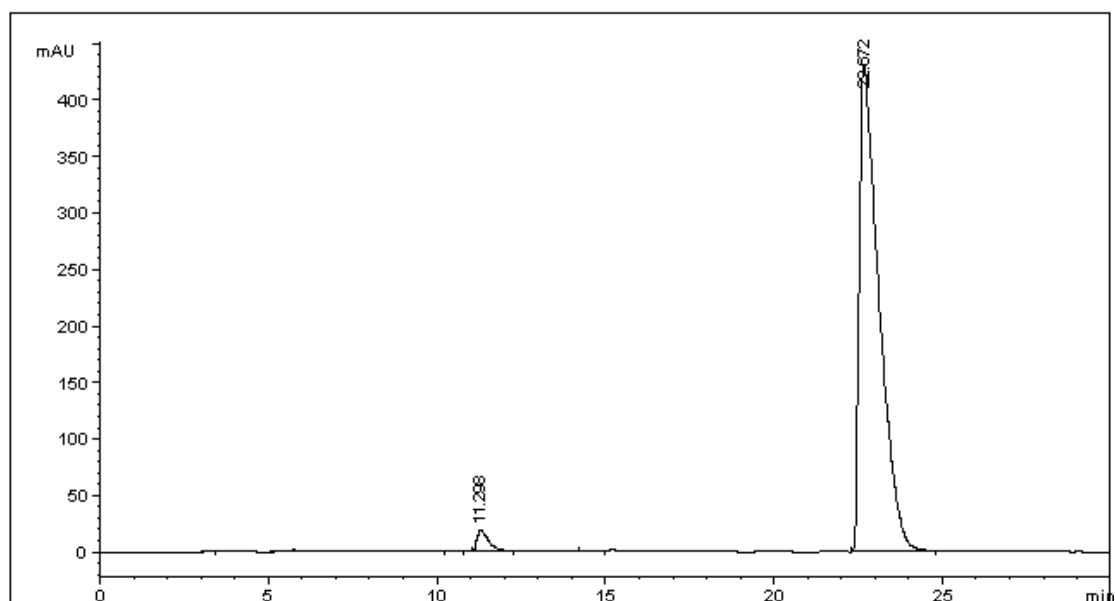

HPLC spectrum of compound 21d

| Peak # | RetTime [min] | Width [min] | Area mAU *s | Area %  |
|--------|---------------|-------------|-------------|---------|
| 1      | 11.298        | 0.3362      | 439.36765   | 2.4527  |
| 2      | 22.672        | 0.5824      | 17474.1     | 97.5473 |

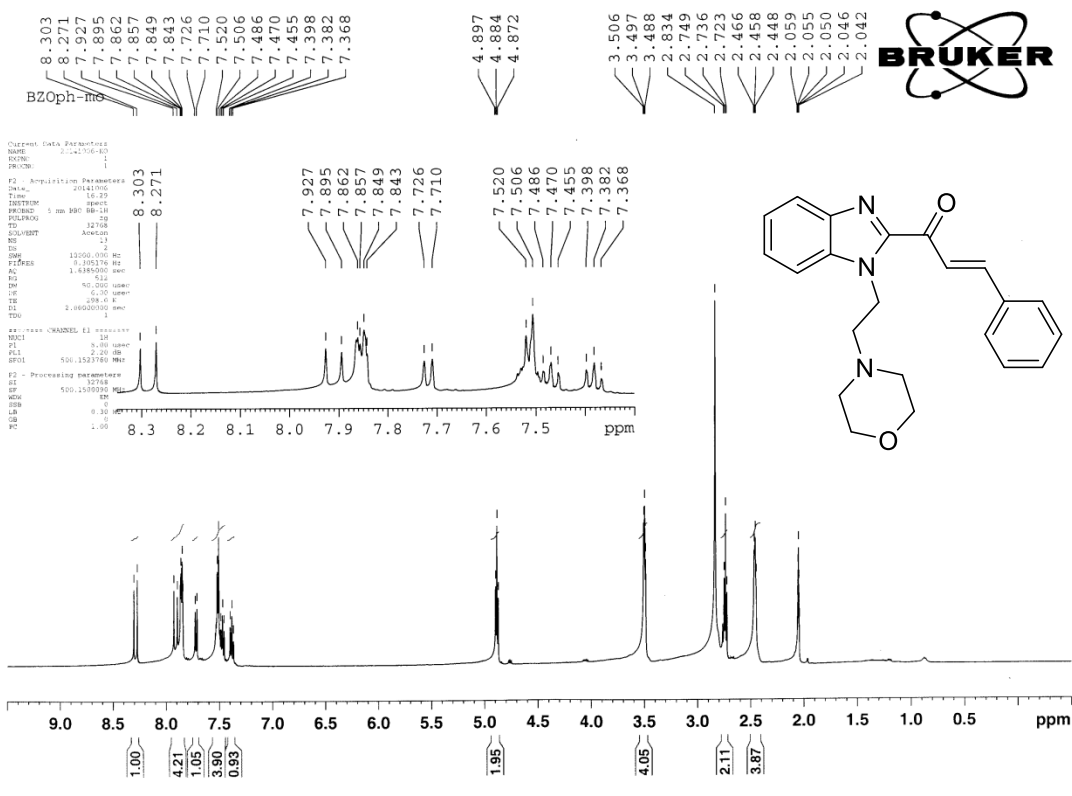

<sup>1</sup>H-NMR spectrum of compound 22a

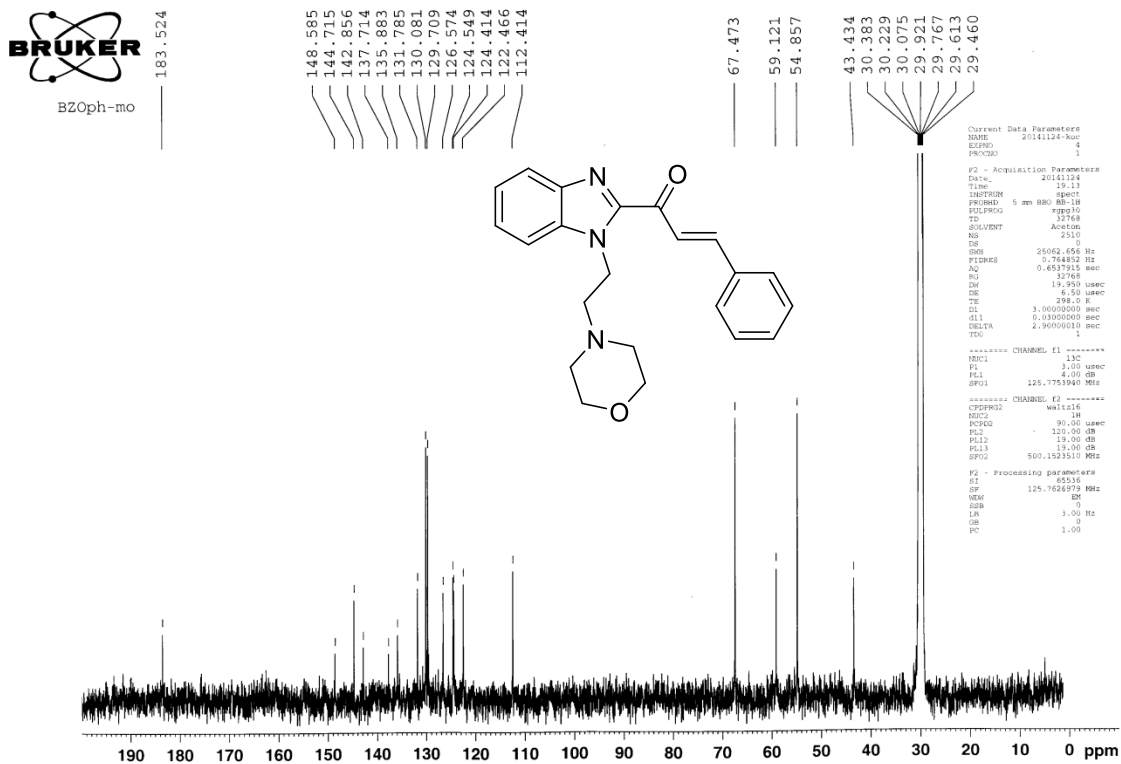

<sup>13</sup>C-NMR spectrum of compound 22a

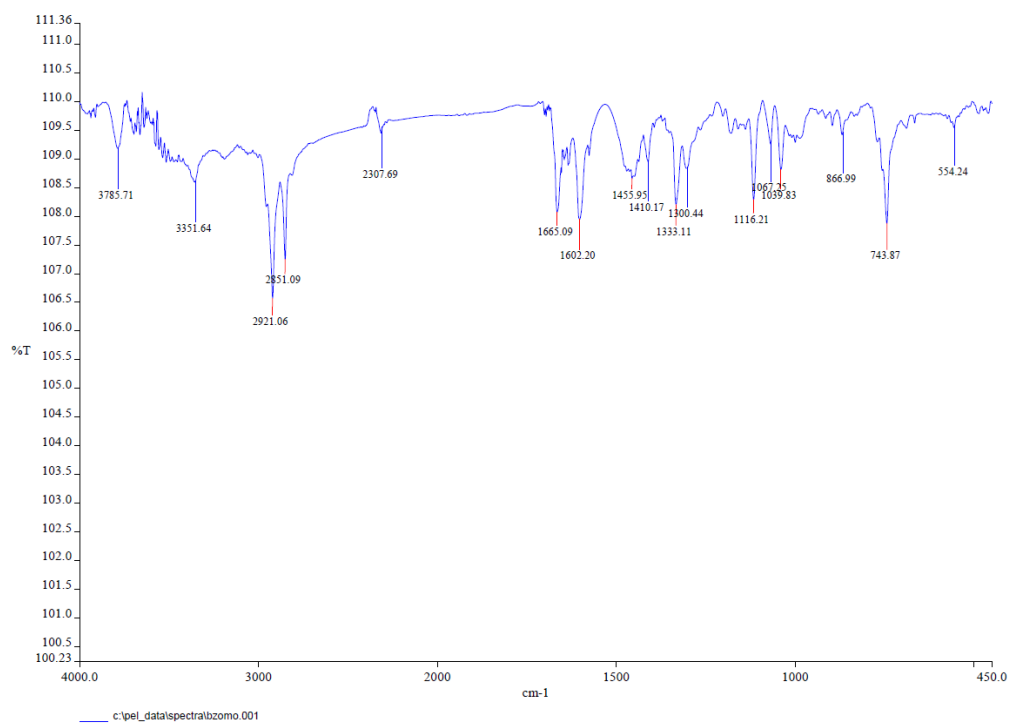

IR spectrum of compound 22a

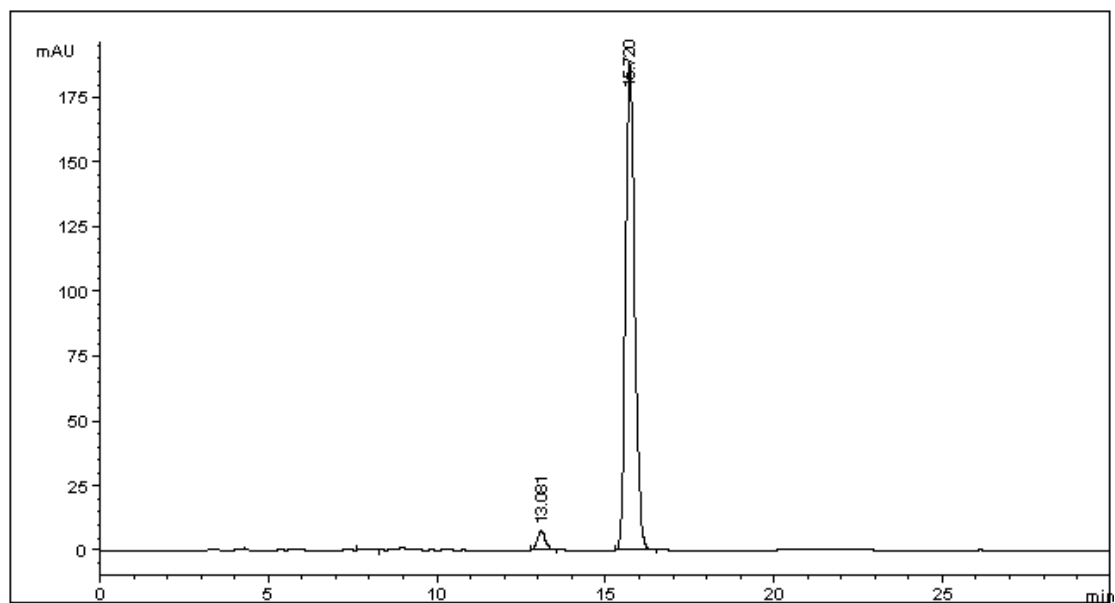

HPLC spectrum of compound 22a

| Peak # | RetTime [min] | Width [min] | Area mAU *s | Area %  |
|--------|---------------|-------------|-------------|---------|
| 1      | 13.081        | 0.263       | 131.5152    | 3.5487  |
| 2      | 15.72         | 0.2962      | 3574.548    | 96.4513 |

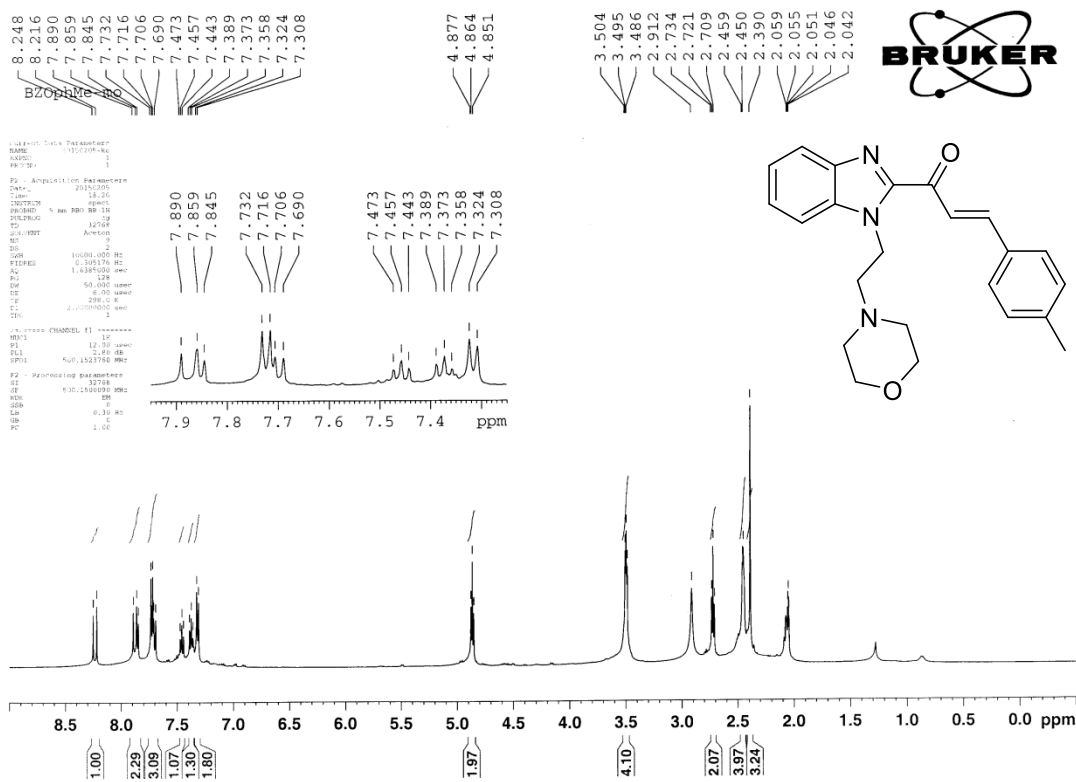

<sup>1</sup>H-NMR spectrum of compound 22b

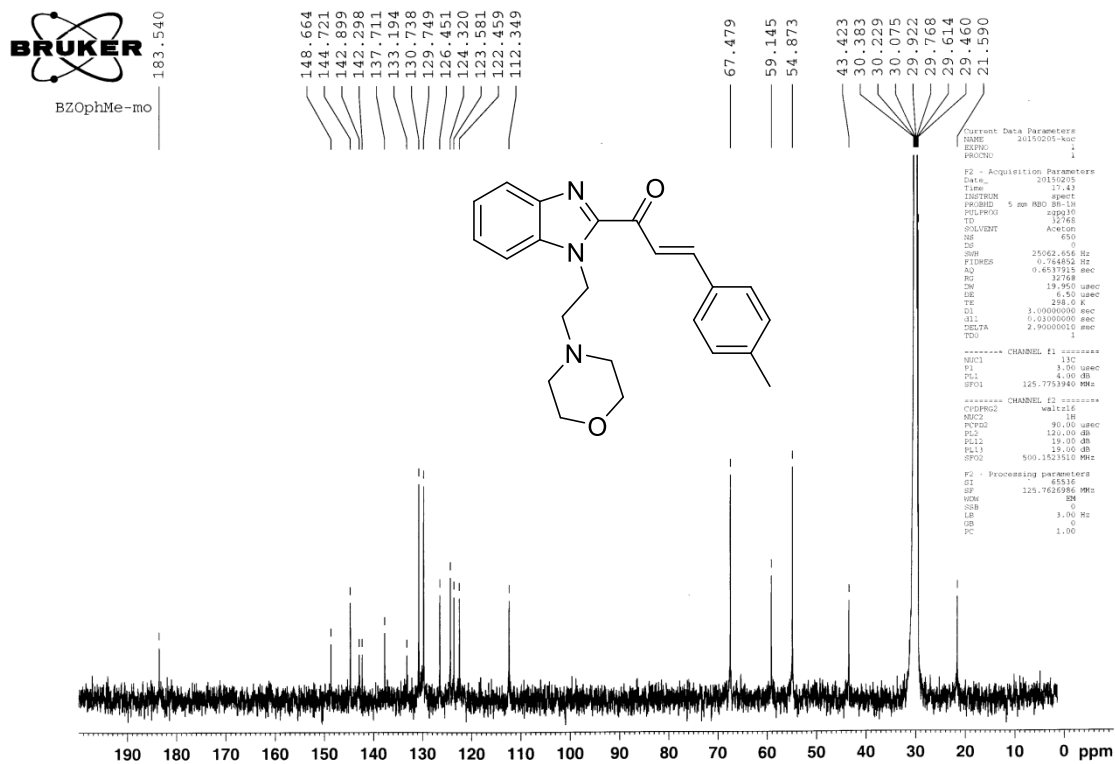

<sup>13</sup>C-NMR spectrum of compound 22b

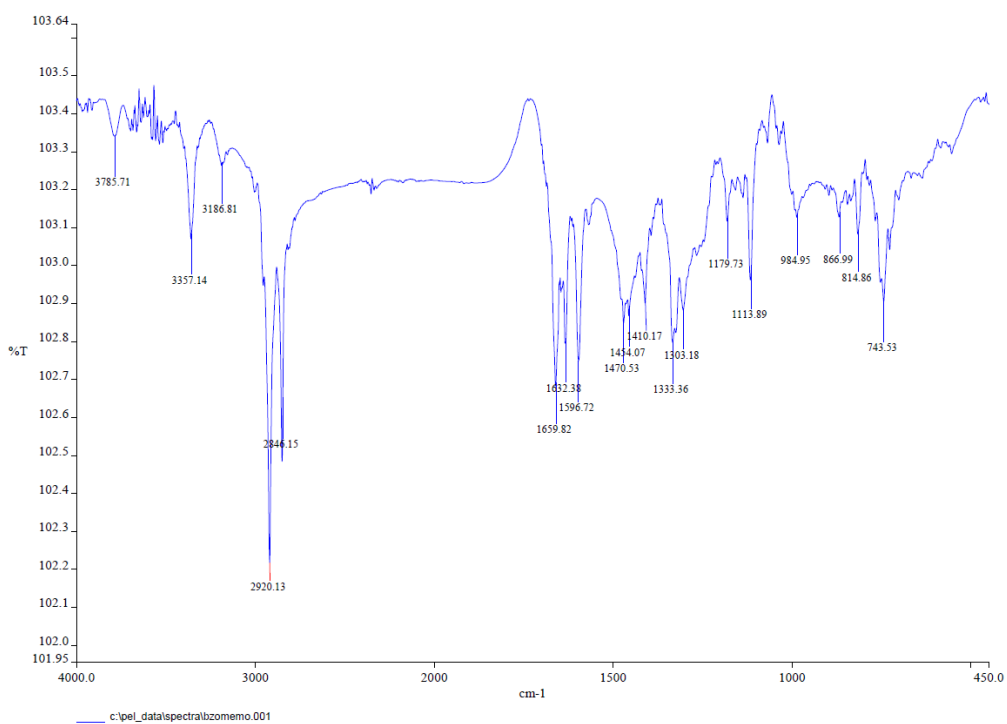

IR spectrum of compound **22b**

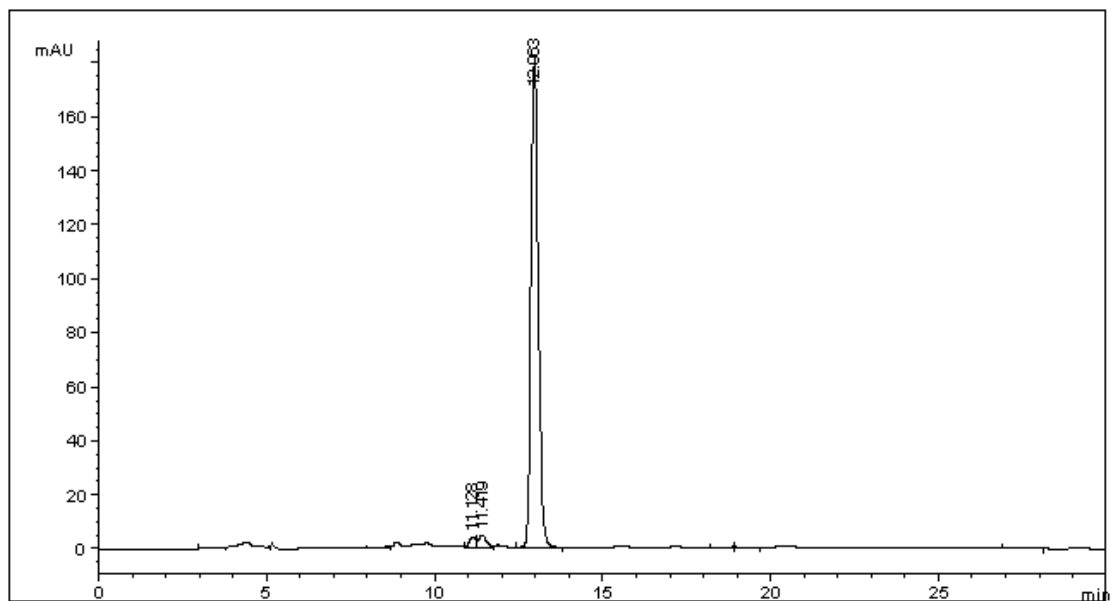

HPLC spectrum of compound **22b**

| Peak # | RetTime [min] | Width [min] | Area mAU *s | Area %  |
|--------|---------------|-------------|-------------|---------|
| 1      | 11.128        | 0.2204      | 51.86035    | 1.8558  |
| 2      | 11.419        | 0.2363      | 68.21777    | 2.4412  |
| 3      | 12.963        | 0.2307      | 2674.29761  | 95.7029 |



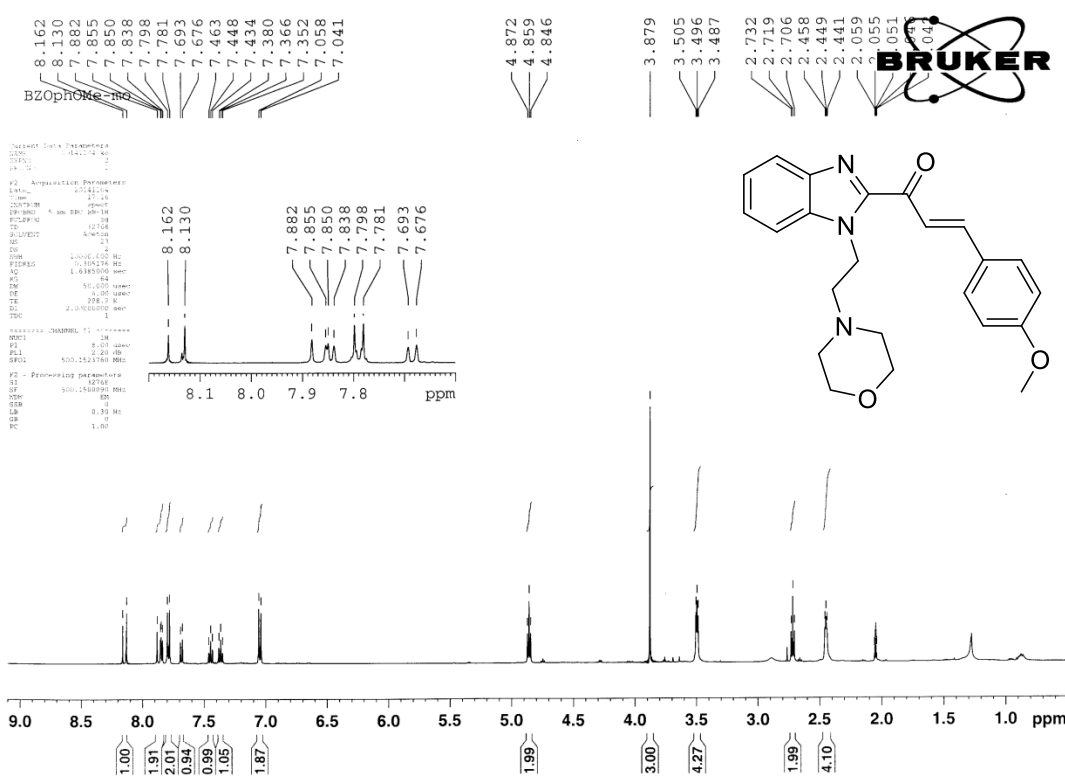

<sup>1</sup>H-NMR spectrum of compound 22c

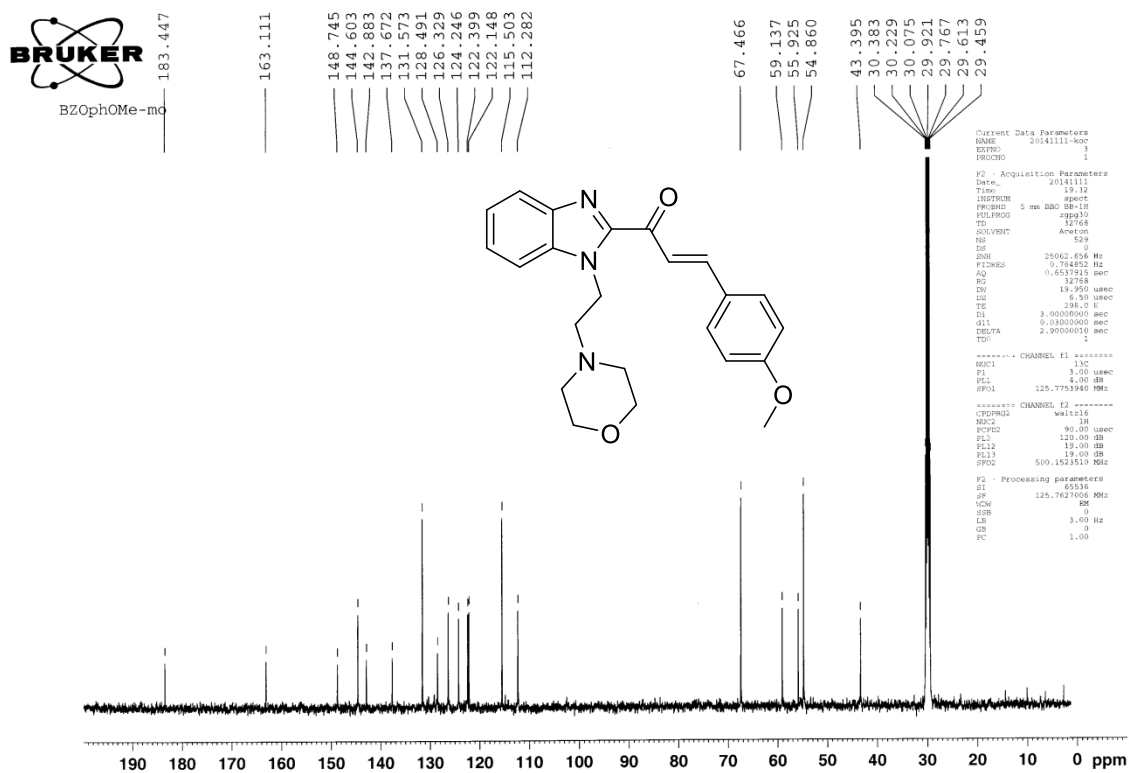

<sup>13</sup>C-NMR spectrum of compound 22c

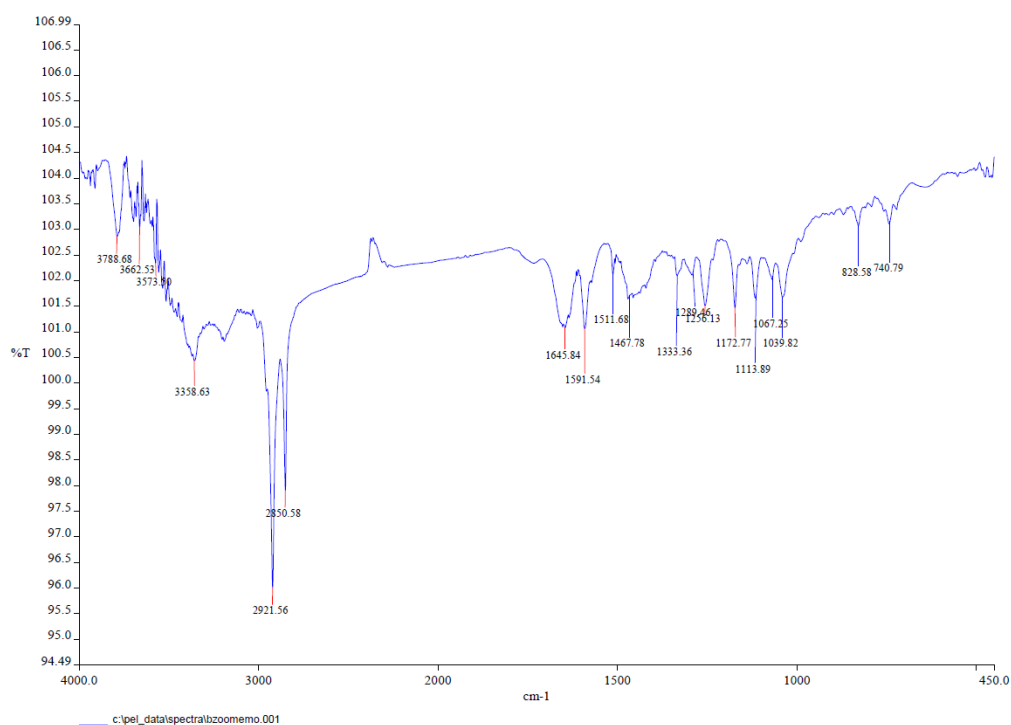

IR spectrum of compound 22c

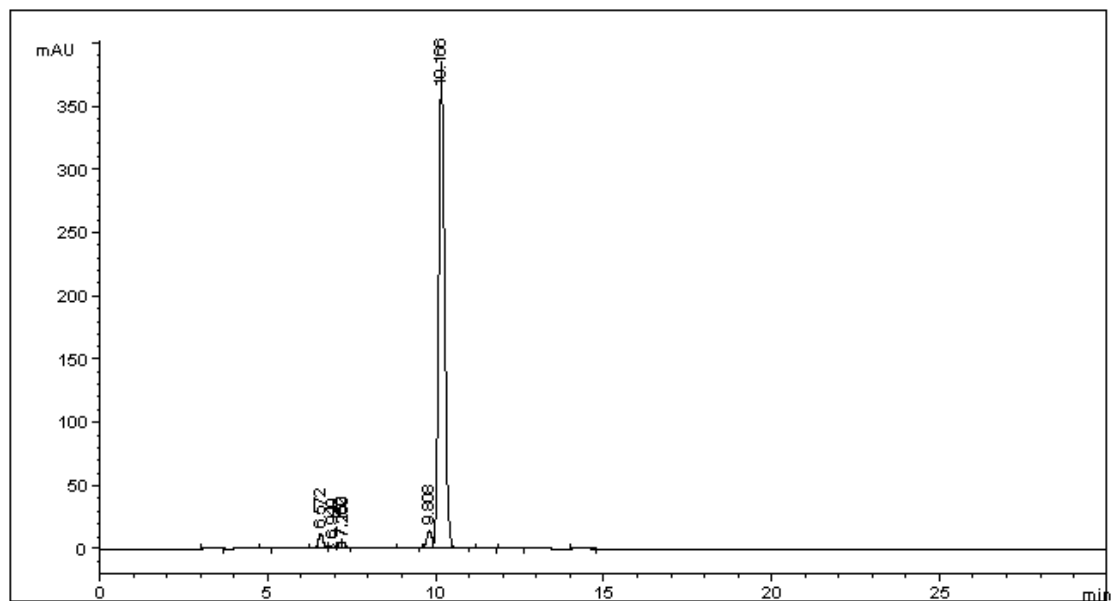

HPLC spectrum of compound 22c

| Peak # | RetTime [min] | Width [min] | Area mAU *s | Area %  |
|--------|---------------|-------------|-------------|---------|
| 1      | 6.949         | 0.1349      | 25.79159    | 0.5232  |
| 2      | 7.162         | 0.1196      | 32.28178    | 0.6549  |
| 3      | 7.25          | 0.1134      | 27.91112    | 0.5662  |
| 4      | 9.808         | 0.1719      | 153.38657   | 3.1118  |
| 5      | 10.166        | 0.1891      | 4689.81201  | 95.1438 |

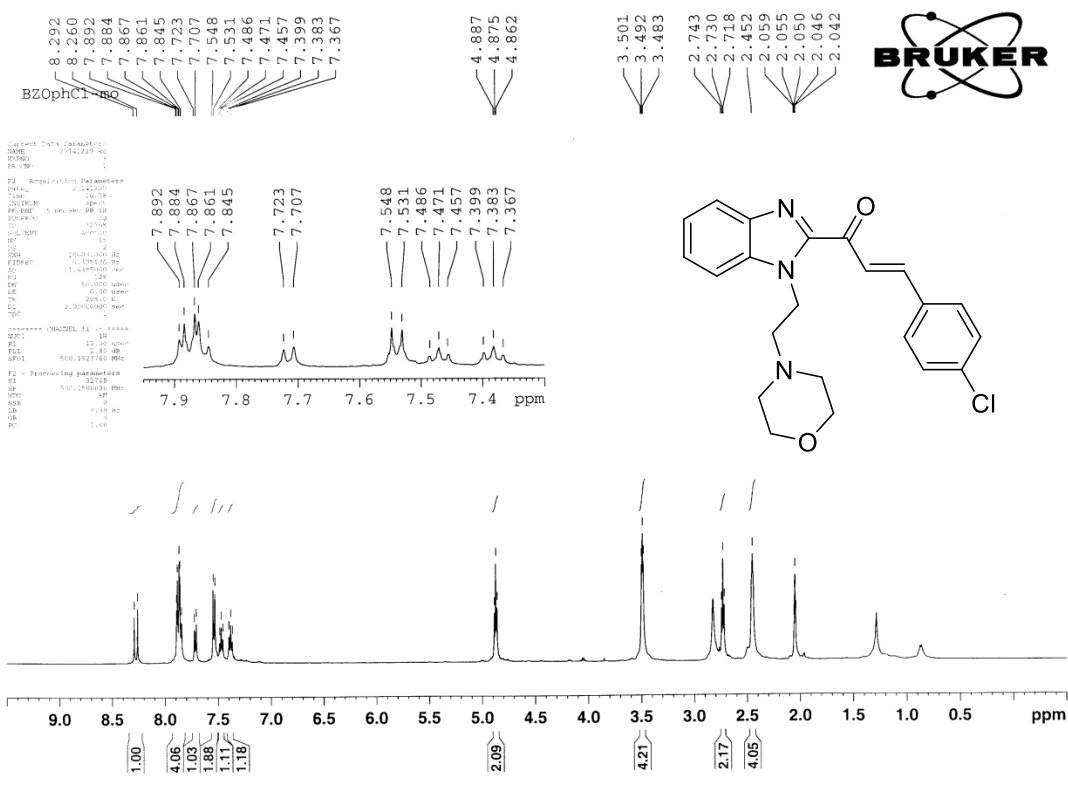

<sup>1</sup>H-NMR spectrum of compound 22d

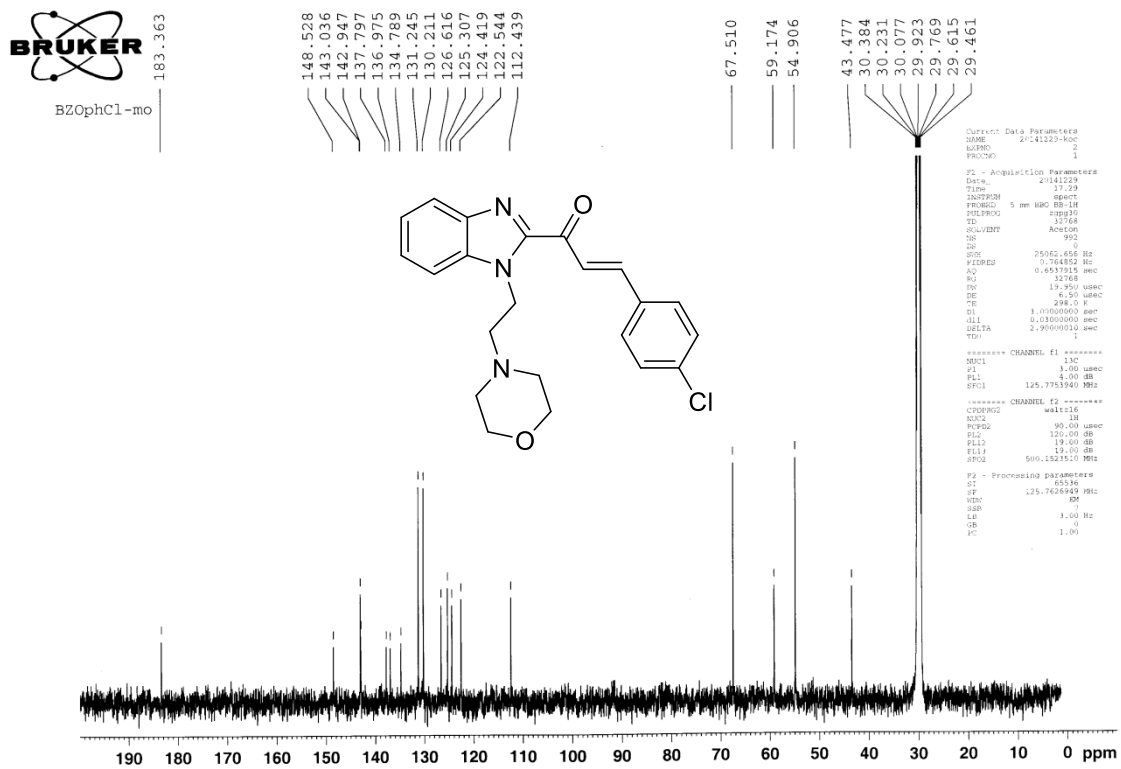

<sup>13</sup>C-NMR spectrum of compound 22d

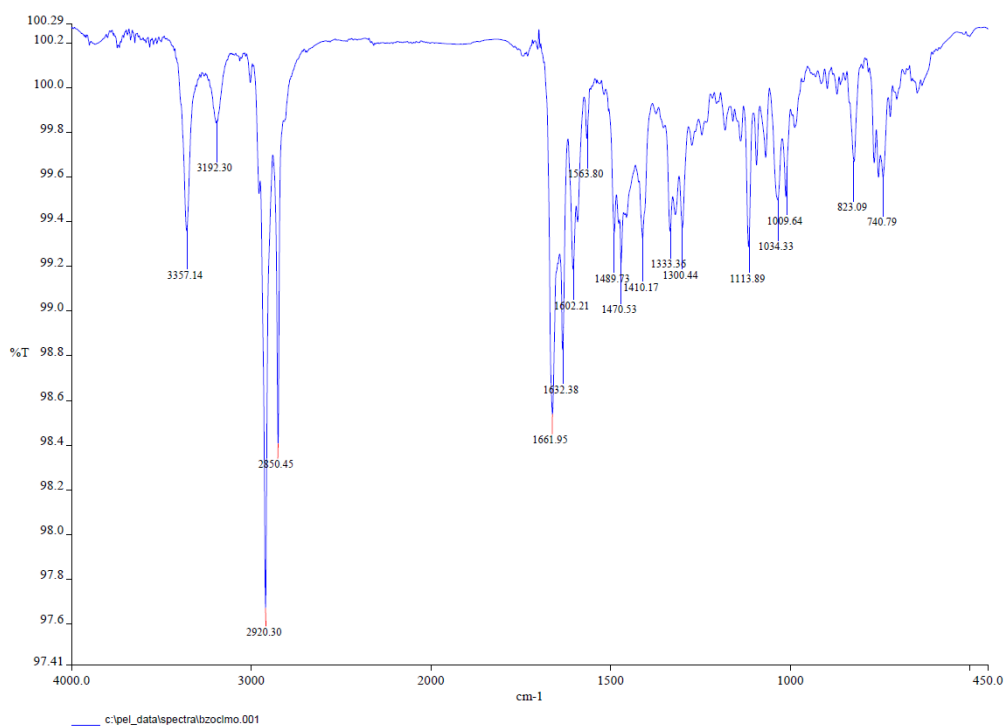

IR spectrum of compound 22d

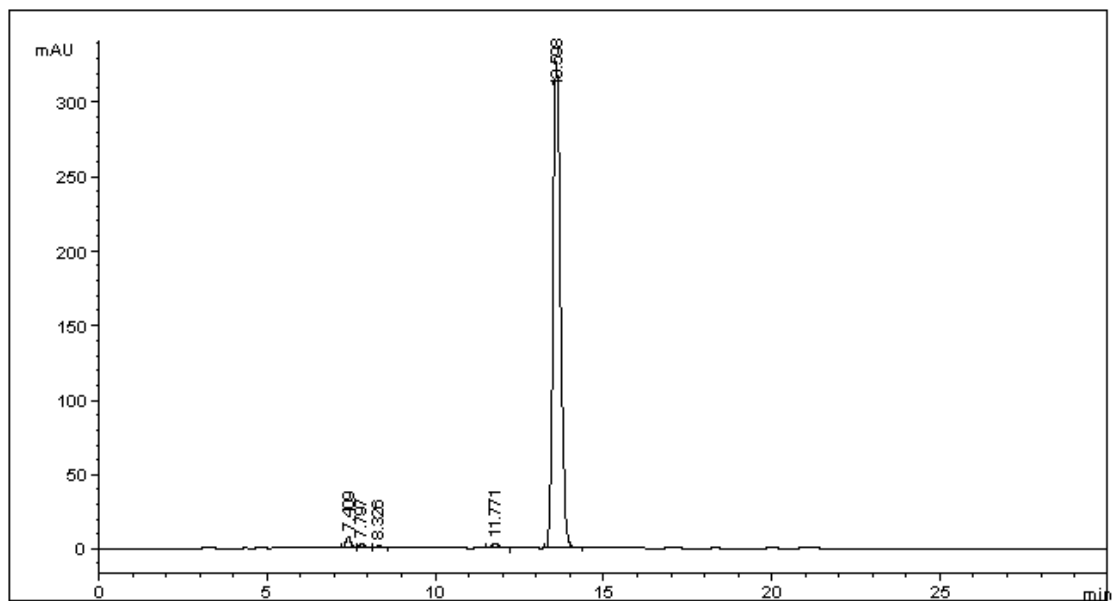

HPLC spectrum of compound 22d

| Peak # | RetTime [min] | Width [min] | Area mAU *s | Area %  |
|--------|---------------|-------------|-------------|---------|
| 1      | 7.409         | 0.1596      | 80.65369    | 1.5400  |
| 2      | 7.797         | 0.1728      | 40.02195    | 0.7642  |
| 3      | 8.326         | 0.1800      | 26.33945    | 0.5029  |
| 4      | 11.771        | 0.2311      | 50.84013    | 0.9708  |
| 5      | 13.598        | 0.2397      | 5039.33447  | 96.2221 |

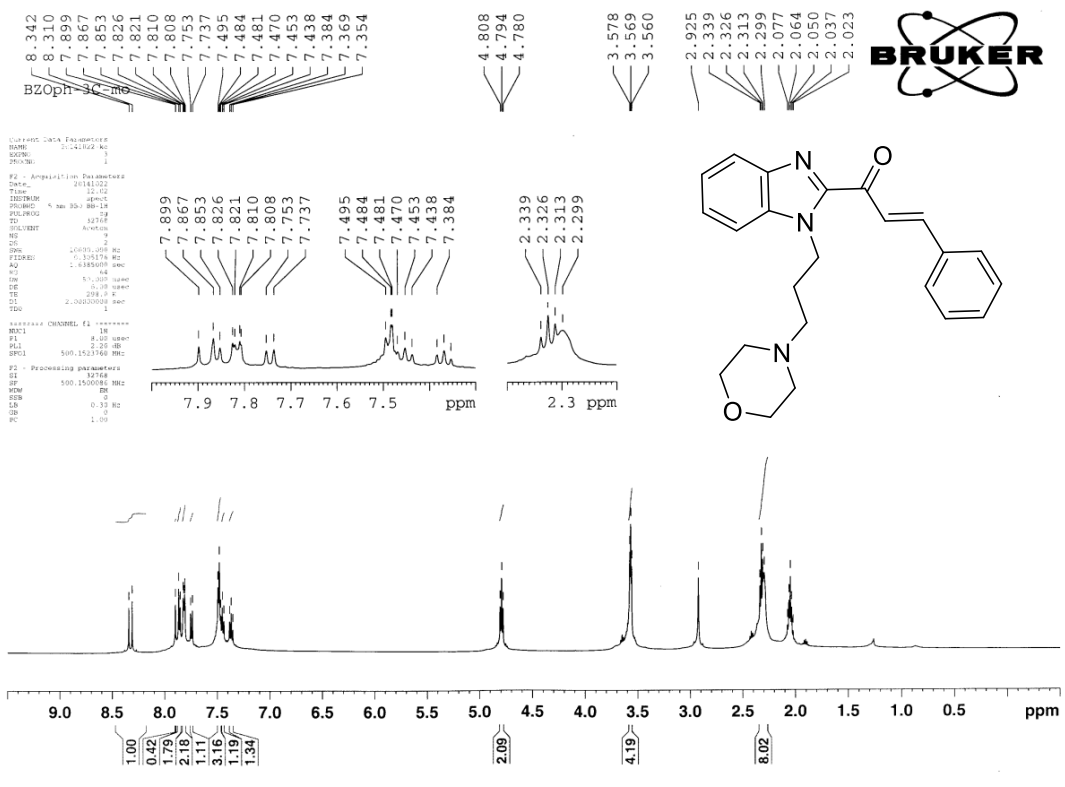

<sup>1</sup>H-NMR spectrum of compound 23a

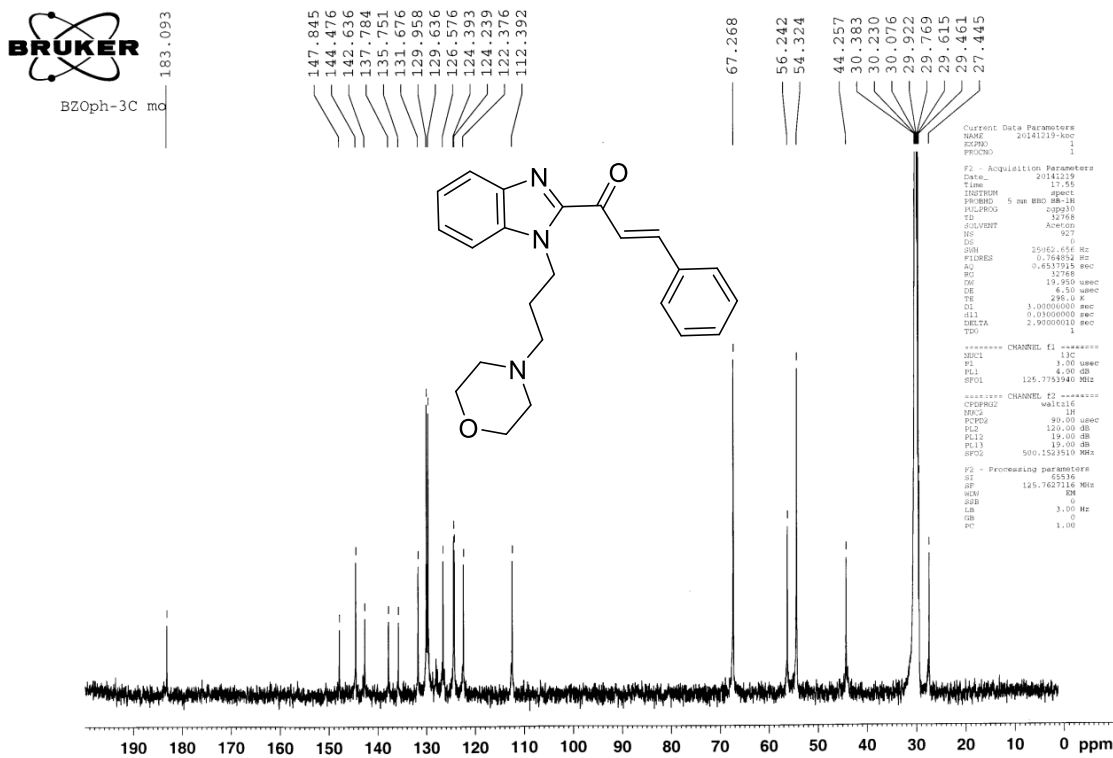

<sup>13</sup>C-NMR spectrum of compound 23a

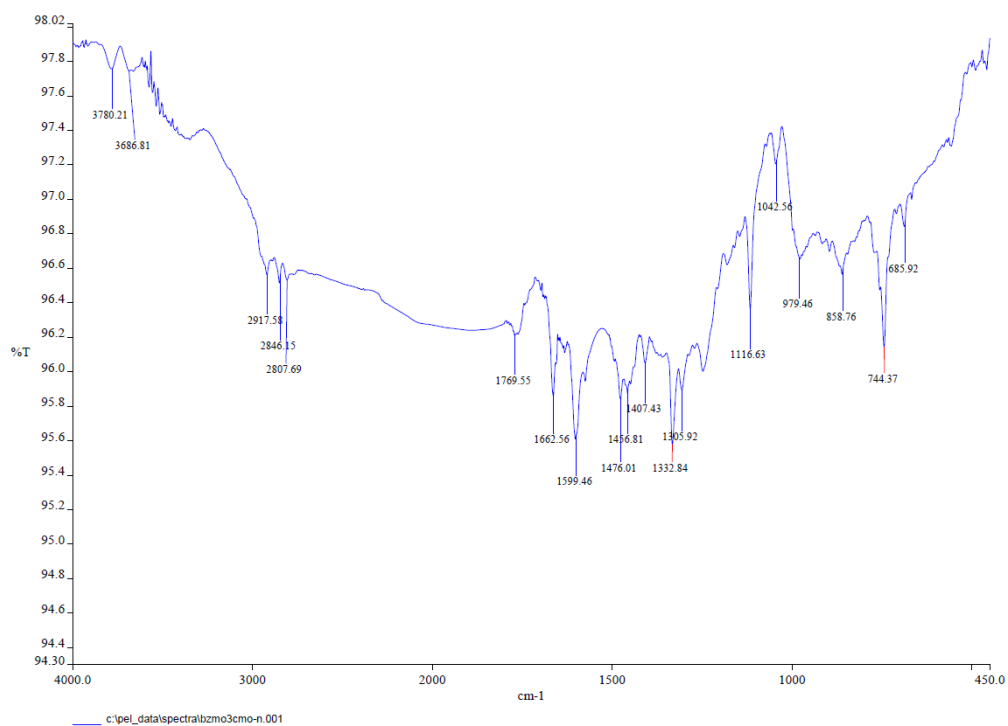

IR spectrum of compound 23a

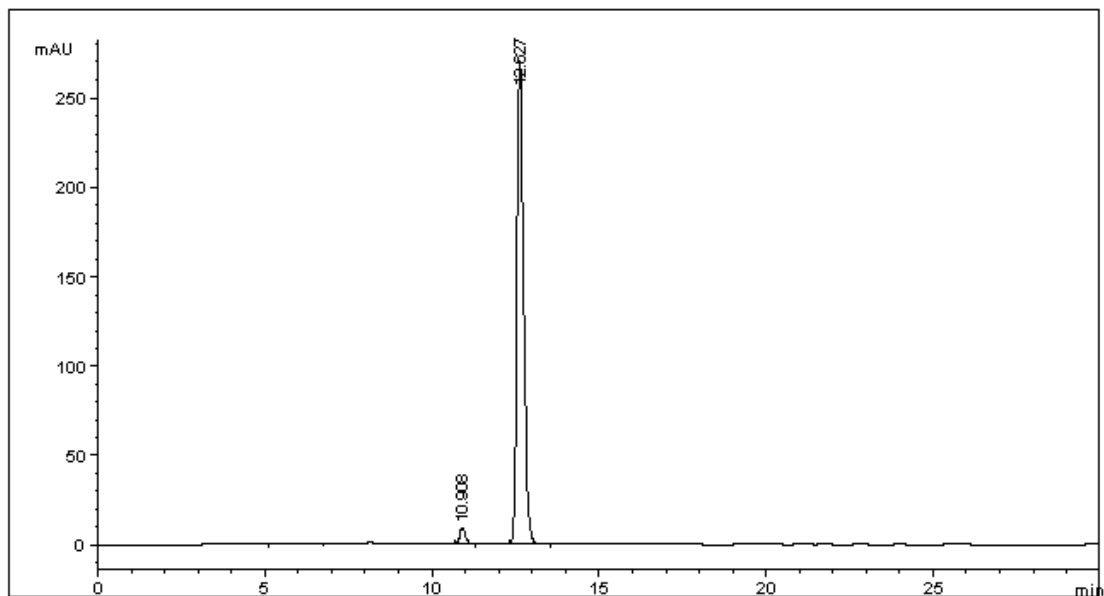

HPLC spectrum of compound 23a

| Peak # | RetTime [min] | Width [min] | Area mAU *s | Area %  |
|--------|---------------|-------------|-------------|---------|
| 1      | 10.908        | 0.1868      | 105.05498   | 2.6781  |
| 2      | 12.627        | 0.2189      | 3817.72192  | 97.3219 |

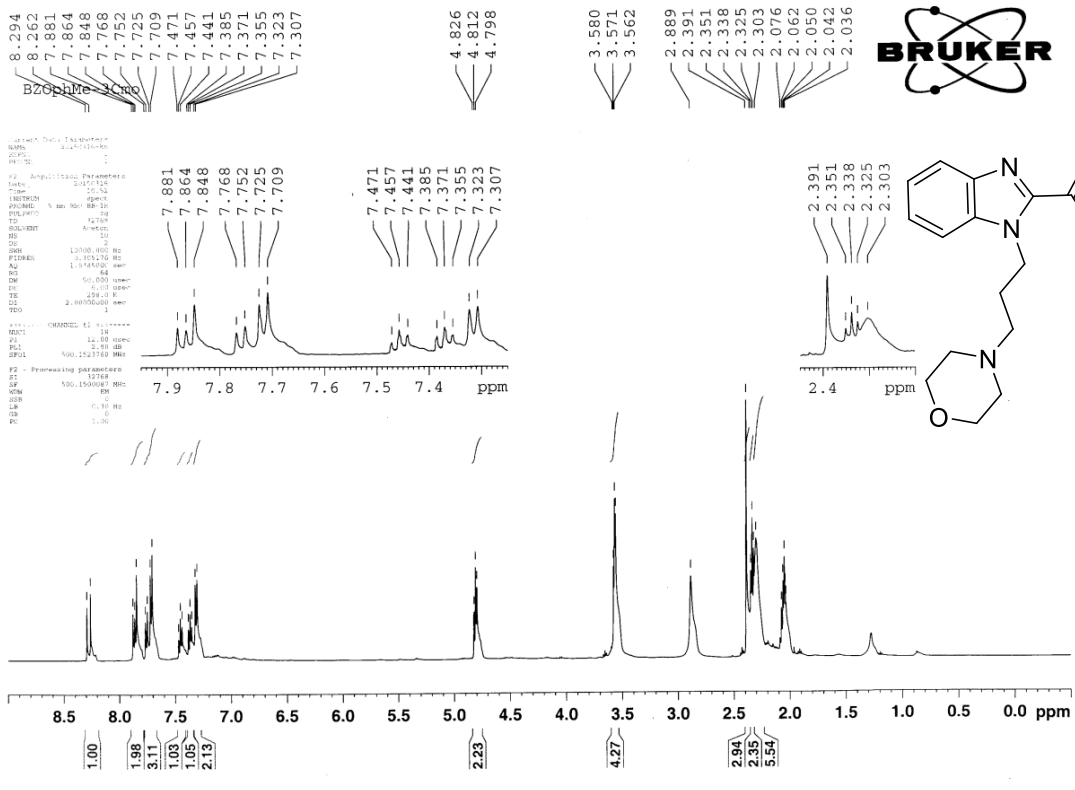

<sup>1</sup>H-NMR spectrum of compound 23b

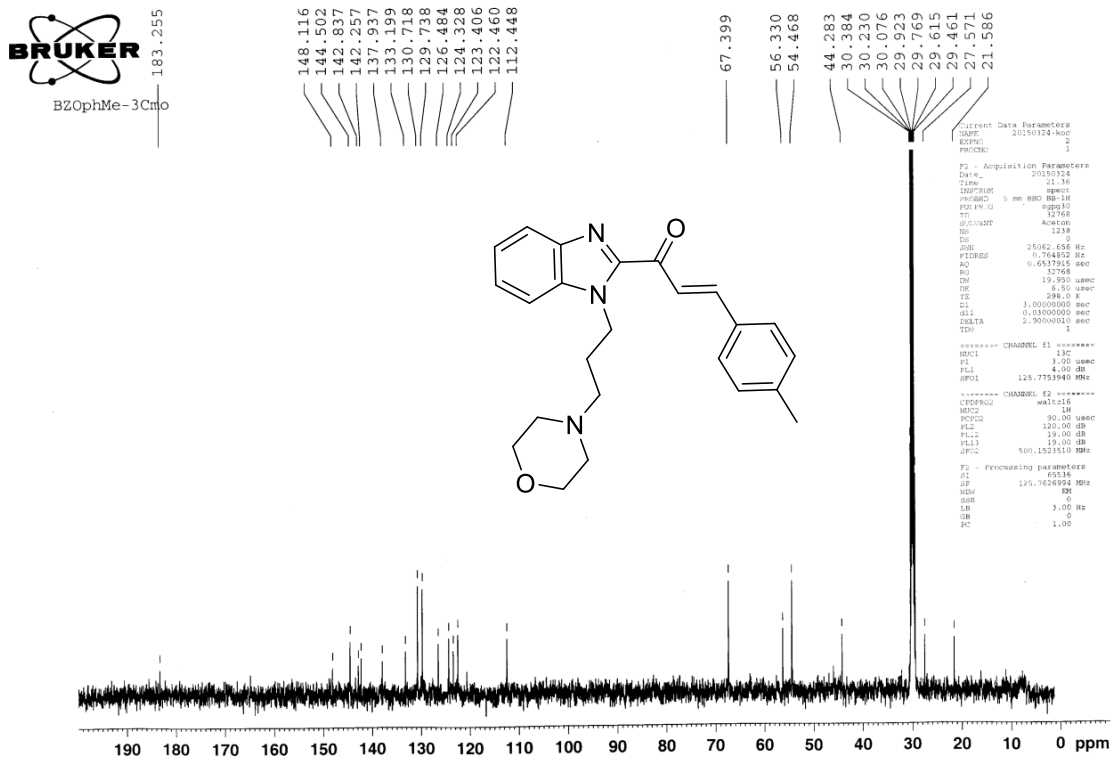

<sup>13</sup>C-NMR spectrum of compound 23b

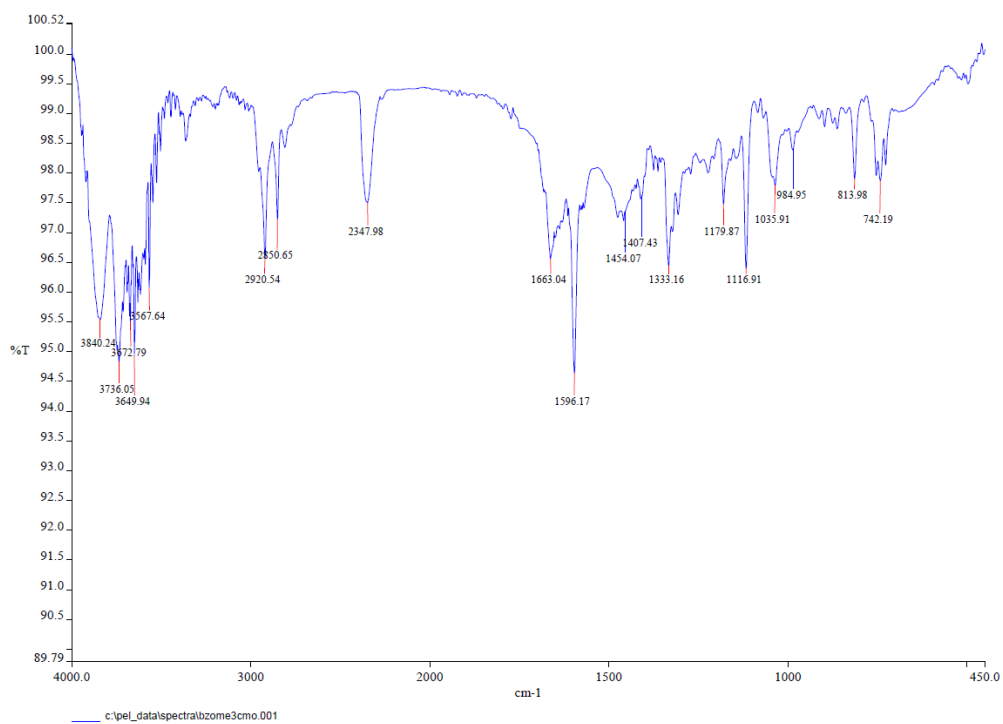

IR spectrum of compound 23b

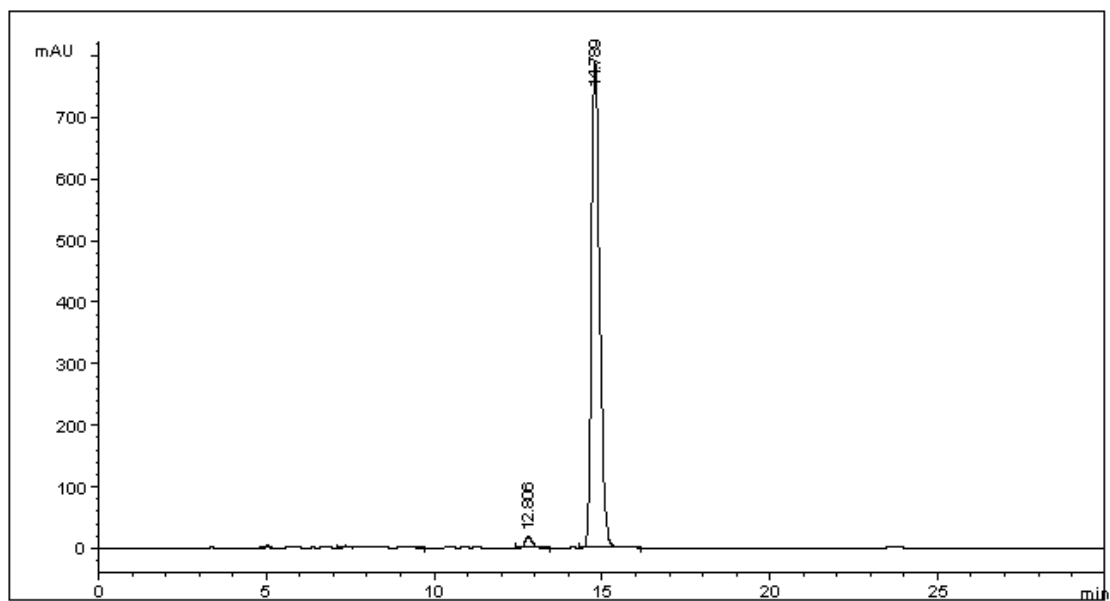

HPLC spectrum of compound 23b

| Peak # | RetTime [min] | Width [min] | Area mAU *s | Area %  |
|--------|---------------|-------------|-------------|---------|
| 1      | 12.806        | 0.2203      | 278.77322   | 2.0574  |
| 2      | 14.789        | 0.2576      | 13271.3     | 97.9426 |



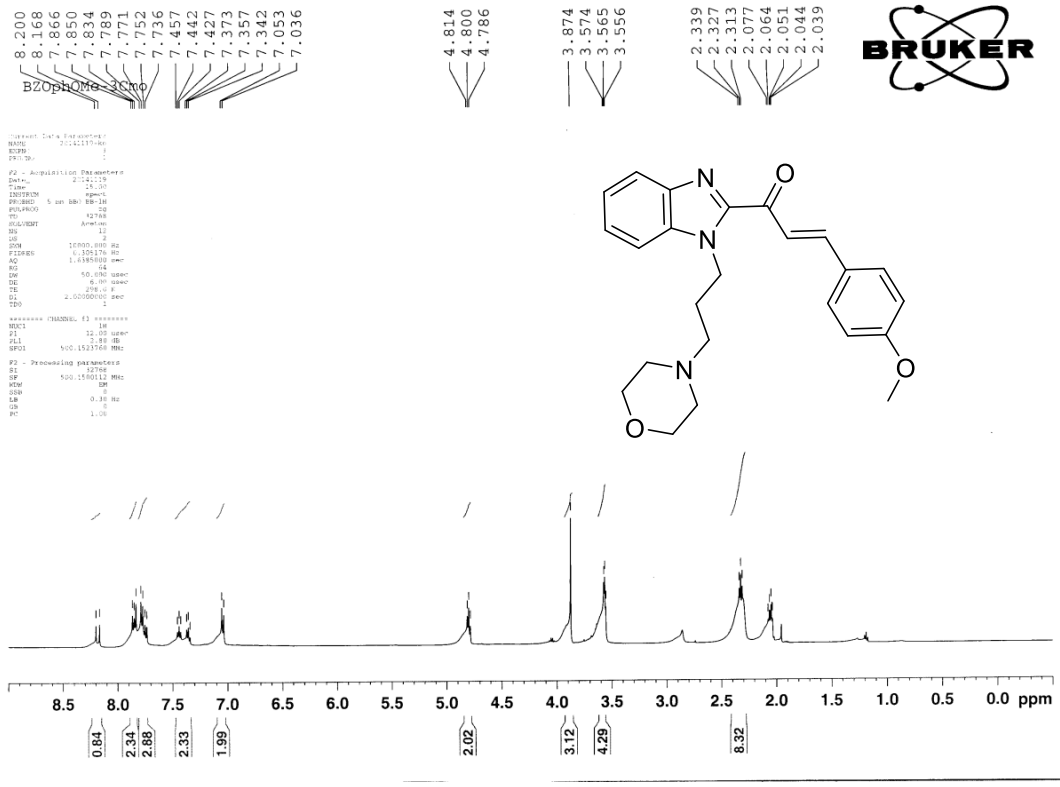

<sup>1</sup>H-NMR spectrum of compound 23c

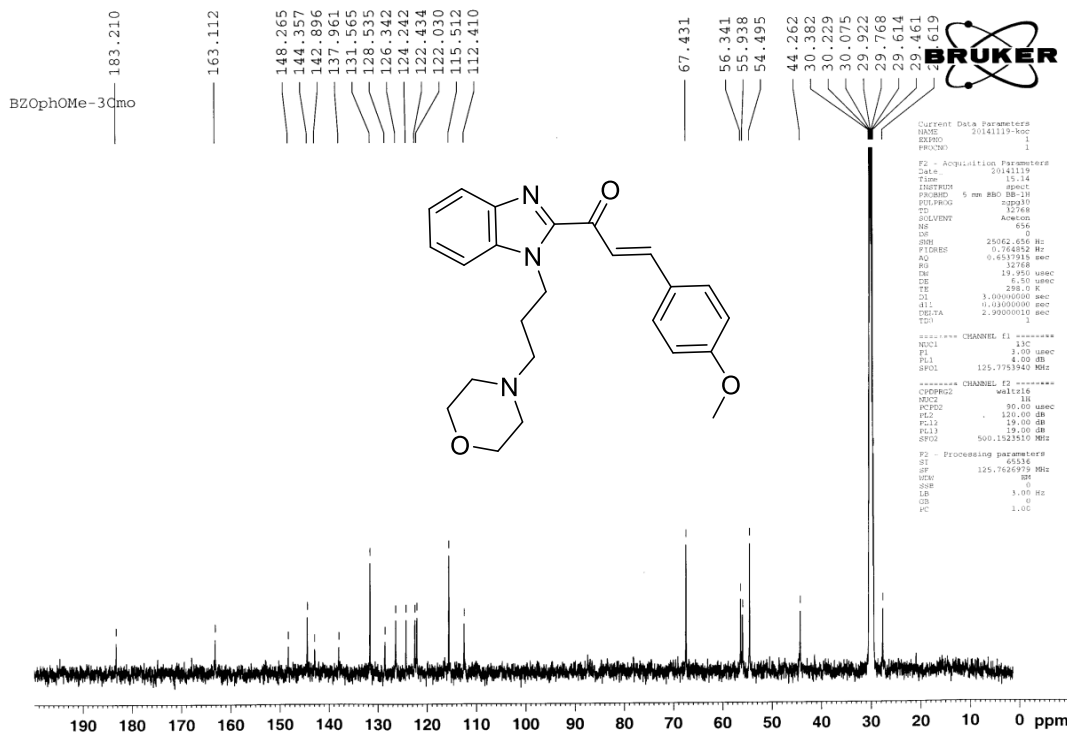

<sup>13</sup>C-NMR spectrum of compound 23c

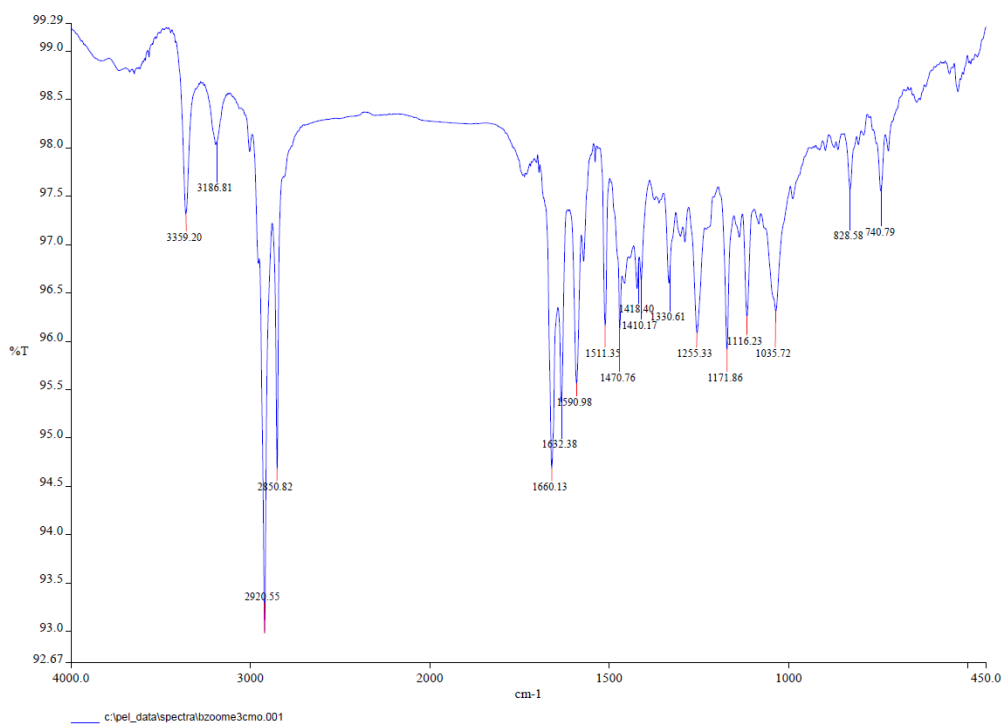

IR spectrum of compound 23c

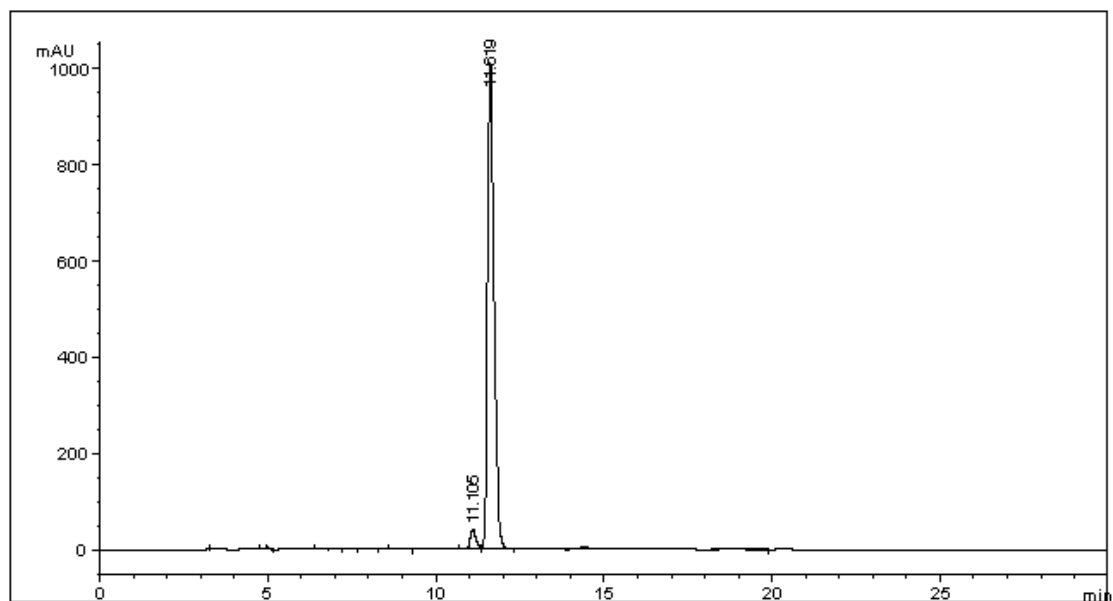

HPLC spectrum of compound 23c

| Peak # | RetTime [min] | Width [min] | Area mAU *s | Area % |
|--------|---------------|-------------|-------------|--------|
| 1      | 11.105        | 0.1937      | 513.34729   | 3.631  |
| 2      | 11.619        | 0.2083      | 13623.2     | 96.369 |

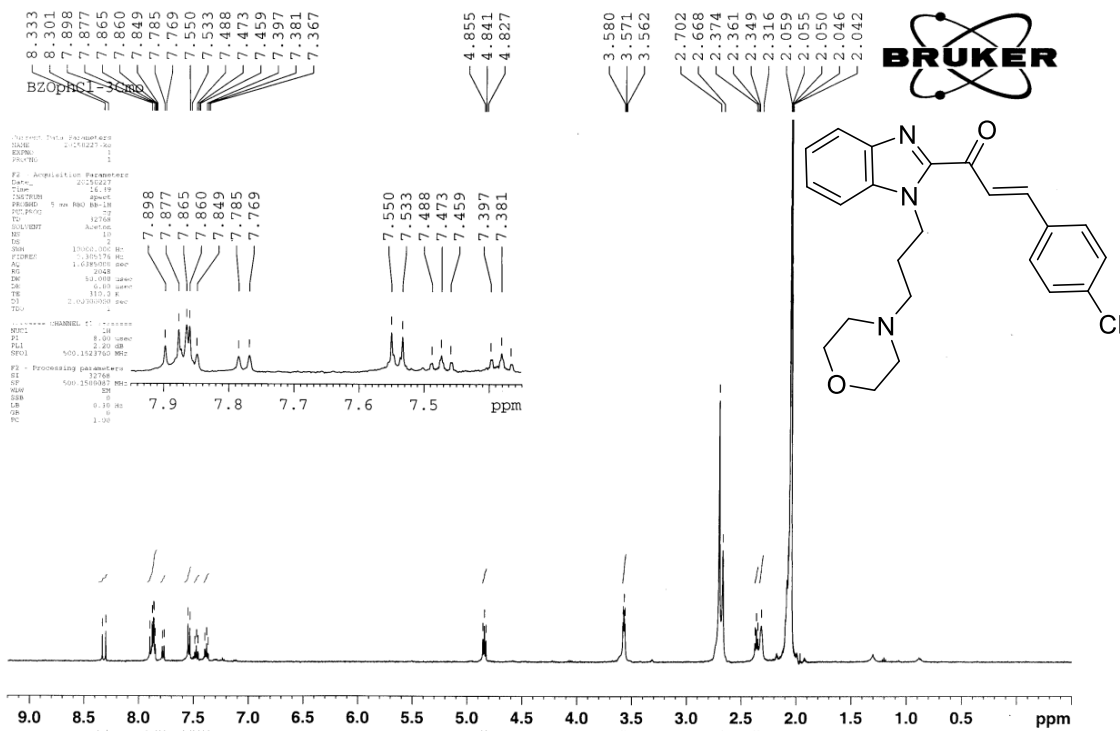

<sup>1</sup>H-NMR spectrum of compound 23d

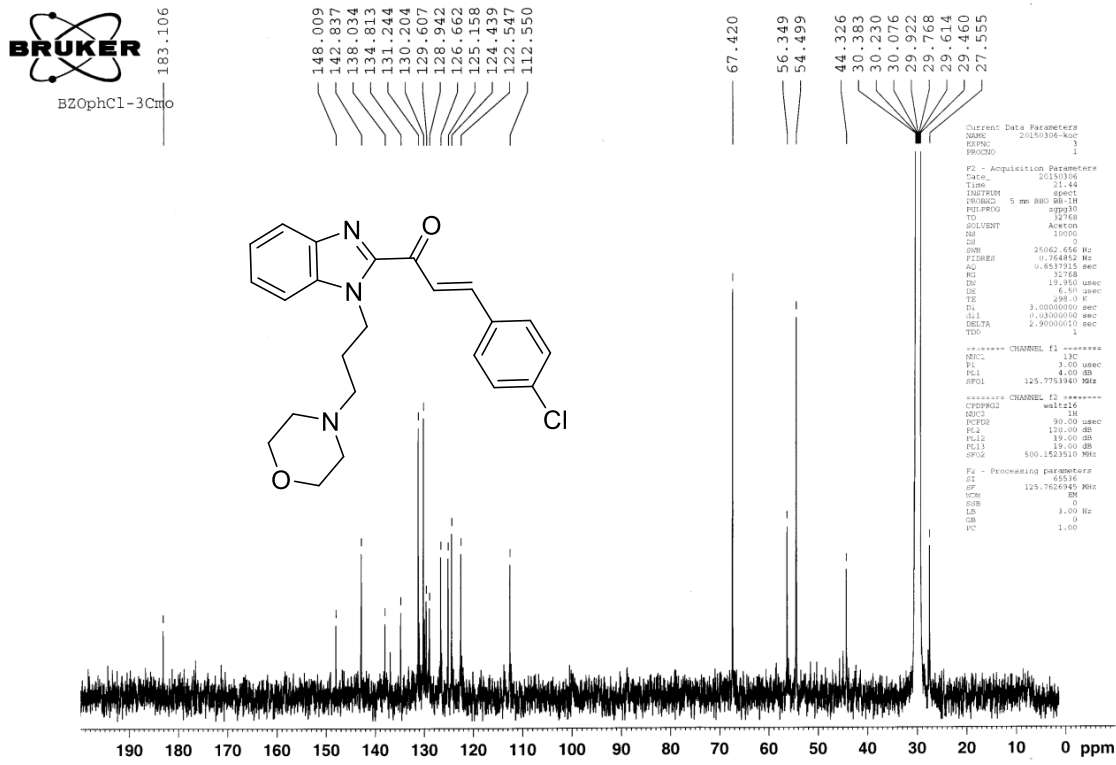

<sup>13</sup>C-NMR spectrum of compound 23d

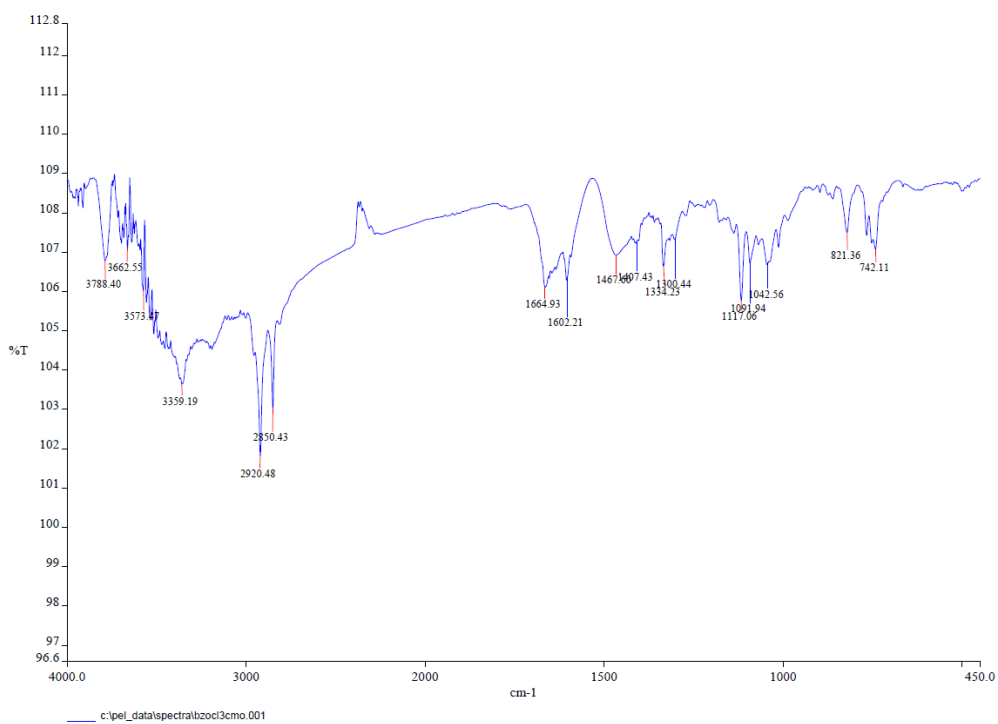

IR spectrum of compound 23d

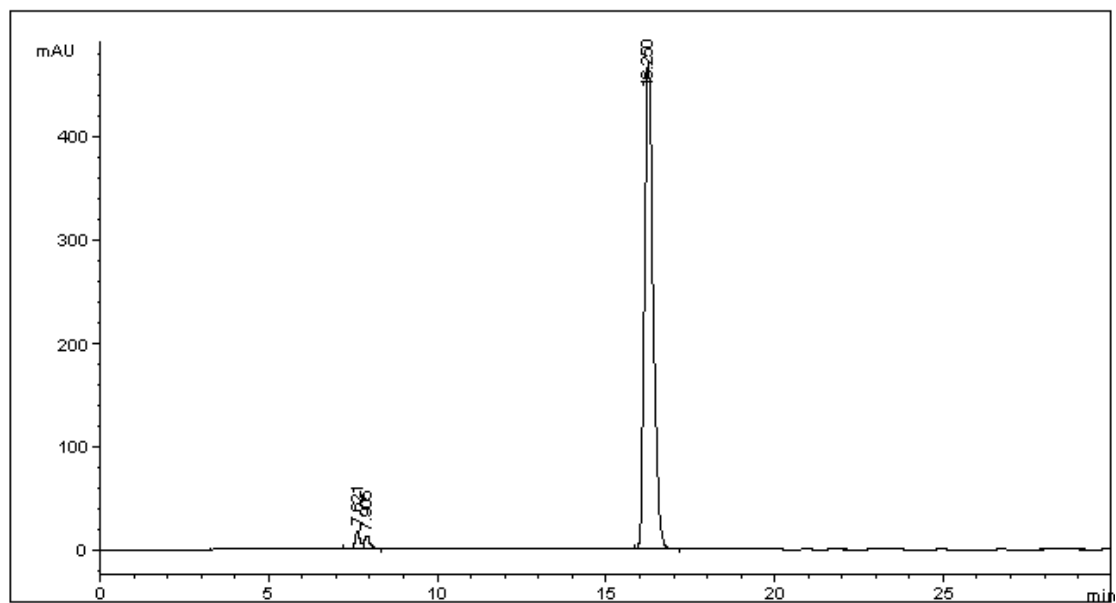

HPLC spectrum of compound 23d

| Peak # | RetTime [min] | Width [min] | Area mAU *s | Area % |
|--------|---------------|-------------|-------------|--------|
| 1      | 7.621         | 0.1547      | 187.74409   | 2.1252 |
| 2      | 7.905         | 0.1755      | 161.00226   | 1.8225 |
| 3      | 16.250        | 0.2775      | 8485.20020  | 96.052 |

## (2) Flow Cytometry Data

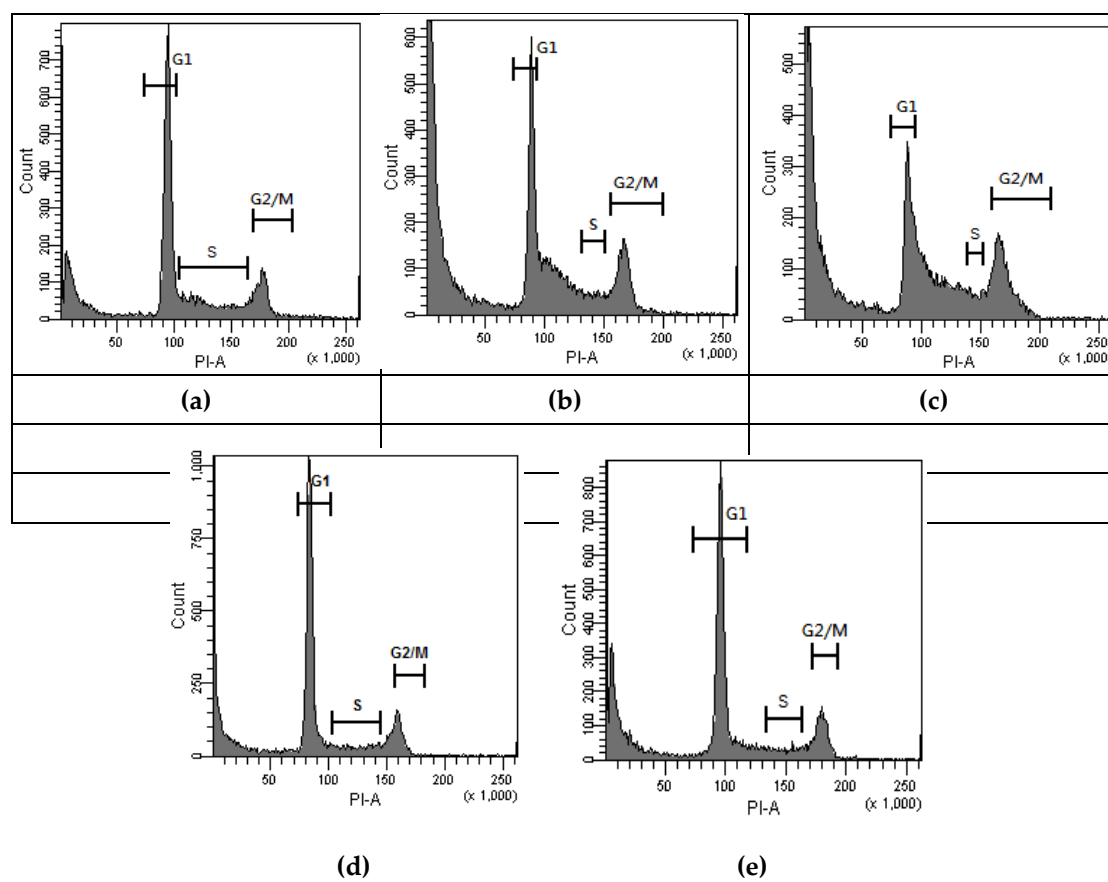

**Figure S1.** DNA histograms of exponentially growing OVCAR-3 cells with different treatments: (a) cell only; (b) compound **20a**; (c) compound **21a**; (d) compound **22a**; (e) compound **23a**.
